1 **Title page**

2 The enrichment of breakpoints in late-replicating chromatin provides novel insights into  
3 chromoanagenesis mechanisms

4

5 **Authors**

6 Nicolas Chatron <sup>1,2,3\*</sup>, Giuliana Giannuzzi <sup>3</sup>, Pierre-Antoine Rollat-Farnier <sup>1,4</sup>, Flavie Diguët <sup>1,2</sup>, Eleonora  
7 Porcu <sup>3</sup>, Tony Yammine <sup>1,2</sup>, Kevin Uguen <sup>5</sup>, Zohra-Lydia Bellil <sup>1,2</sup>, Julia Lauer Zillhardt <sup>6</sup>, Arthur Sorlin  
8 <sup>7</sup>, Flavie Ader <sup>8</sup>, Alexandra Afenjar <sup>9</sup>, Joris Andrieux <sup>10</sup>, Claire Bardel <sup>4</sup>, Eduardo Calpena <sup>11</sup>, Sandra-  
9 Chantot-Bastaraud <sup>12</sup>, Patrick Callier <sup>7</sup>, Nora Chelloug <sup>13</sup>, Emilie Chopin <sup>14</sup>, Marie-Pierre Cordier <sup>1</sup>,  
10 Christèle Dubourg <sup>15</sup>, Laurence Faivre <sup>16</sup>, Françoise Girard <sup>17</sup>, Solveig Heide <sup>18</sup>, Yvan Herenger <sup>19</sup>, Sylvie  
11 Jaillard <sup>20</sup>, Boris Keren <sup>18</sup>, Samantha J. L. Knight <sup>21</sup>, James Lespinasse <sup>22</sup>, Laurence Lohmann <sup>23</sup>, Nathalie  
12 Marle <sup>7</sup>, Reza Maroofian <sup>24</sup>, Alice Masurel-Paulet <sup>16</sup>, Michèle Mathieu-Dramard <sup>25</sup>, Corinne Metay <sup>26</sup>,  
13 Alistair T. Pagnamenta <sup>21</sup>, Marie-France Portnoï <sup>12</sup>, Fabienne Prieur <sup>27</sup>, Marlène Rio <sup>28</sup>, Jean-Pierre  
14 Siffroi <sup>12</sup>, Stéphanie Valence <sup>29</sup>, Jenny C. Taylor <sup>21</sup>, Andrew O. M. Wilkie <sup>11</sup>, Patrick Edery <sup>1,2</sup>, Alexandre  
15 Reymond <sup>3</sup>, Damien Sanlaville <sup>1,2</sup>, Caroline Schluth-Bolard <sup>1,2</sup>

16

17 **Authors' affiliations**

- 18 1. Service de Génétique, Hospices Civils de Lyon, Lyon, France
- 19 2. Equipe GENDEV, CRNL, INSERM U1028, CNRS UMR5292 UCBL1, Lyon, France
- 20 3. Center for Integrative Genomics, University of Lausanne, 1015 Lausanne, Switzerland
- 21 4. Cellule Bioinformatique Plateforme NGS, Hospices Civils de Lyon, Lyon, France
- 22 5. Service de Génétique, CHU Brest, Brest, France
- 23 6. Unité de Diagnostic Préimplantatoire, Laboratoires de Diagnostic Génétique, Hôpitaux  
24 Universitaires de Strasbourg, Strasbourg, France
- 25 7. Laboratoire de génétique chromosomique et moléculaire, CHU de Dijon, Dijon, France
- 26 8. AP-HP, Département de Génétique médicale, Cardiogénétique et myogénétique moléculaire et  
27 cellulaire, Hôpital de la Pitié-Salpêtrière, Paris, France
- 28 9. AP-HP, Département de Génétique médicale, UF de Génétique clinique, hôpital d'Enfants  
29 Armand Trousseau, Paris, France
- 30 10. CHRU de Lille, Service de Génétique, Hôpital Jeanne de Flandre, 59037 Lille Cedex, France

- 31 11. Clinical Genetics Group, MRC Weatherall Institute of Molecular Medicine, University of  
32 Oxford, Oxford OX3 9DS, UK
- 33 12. AP-HP, Département de Génétique médicale, UF de Génétique chromosomique, hôpital  
34 d'Enfants Armand Trousseau, Paris, France
- 35 13. Laboratoire de cytogénétique, Service de génétique médicale, CHRU Tours, Tours, France
- 36 14. Centre de Biotechnologie Cellulaire, Hospices Civils de Lyon, Lyon, France
- 37 15. Service de Génétique Moléculaire et Génomique médicale, CHU Rennes, et IGDR, CNRS  
38 UMR 6290, Université de Rennes 1, Rennes, France
- 39 16. Centre de génétique, Hôpital d'enfants, CHU de Dijon, Dijon, France
- 40 17. Laboratoire de cytogénétique constitutionnelle et prénatale, CHU Strasbourg, France
- 41 18. APHP, Département de Génétique et Centre de Référence Déficiences Intellectuelles de Causes  
42 Rares, Hôpital de la Pitié-Salpêtrière, Paris 75651, France
- 43 19. Service de génétique médicale, CHRU Tours, Tours, France
- 44 20. Univ Rennes, CHU Rennes, INSERM, EHESP, IRSET (Institut de recherche en santé,  
45 environnement et travail) – UMR\_S 1085, F-35000 Rennes, France
- 46 21. Oxford NIHR Biomedical Research Centre, Wellcome Centre for Human Genetics, University  
47 of Oxford, Oxford, UK
- 48 22. Service de génétique, CH Métropole Savoie, Chambéry, France
- 49 23. Département de génétique, Laboratoire CERBA, Saint-Ouen l'Aumône, France
- 50 24. Institute of Neurology, University College London, London, UK
- 51 25. Service de génétique clinique et oncogénétique, CHU Amiens-Picardie, Amiens, France
- 52 26. AP-HP, Hôpital Henri Mondor, Créteil, France
- 53 27. Service de Génétique Clinique, Chromosomique et Moléculaire, CHU Hôpital Nord, Saint-  
54 Etienne, France
- 55 28. AP-HP, Service de Génétique Médicale, Hôpital Necker-Enfants Malades, Paris, France
- 56 29. Sorbonne Université, GRC n°19, pathologies Congénitales du Cervelet-LeucoDystrophies, AP-  
57 HP, Hôpital Armand Trousseau; Hôpital Armand Trousseau, APHP, GHUEP, Service de  
58 Neurologie Pédiatrique, France

60

61 **\*Corresponding author:**

62 Dr Nicolas CHATRON

63 Service de Génétique, Centre de Biologie Pathologie Est, 2<sup>ème</sup> étage

64 Groupement Hospitalier Est, Hospices Civils de Lyon

65 69677 Bron Cedex, France

66 Tel : +33471129640

67 E-mail : [nicolas.chatron@chu-lyon.fr](mailto:nicolas.chatron@chu-lyon.fr)

68

69 **Keywords:**

70 chromoanagenesis, chromothripsis, replication-timing, lamina-associated domains, chromosomal  
71 breakpoint

72

73 **Running title**

74 Chromoanagenesis breakpoints enrichment in late-replicating chromatin.

75 **Abstract**

76 The rise of pangenomic molecular assays allowed uncovering complex rearrangements named  
77 *chromoanagenesis* that were hypothesized to result from catastrophic shattering events. Constitutional  
78 cases have typically been reported individually preventing identification of common features and  
79 uncovering the mechanisms at play. We characterized 20 new *chromoanagenesis* and discovered yet  
80 undescribed features. While literature differentiates *chromothripsis* and its shattering event repaired  
81 through non-homologous end joining from *chromoanasythesis* born to aberrant replicative processes,  
82 we identified shattered chromosomes repaired through a combination of mechanisms. In particular, three  
83 samples present with “rearrangement hubs” comprising a fragmented kilobase-long sequence threaded  
84 throughout the rearrangement.

85 To assess the mechanisms at play, we merged our data with those of 20 published constitutional complex  
86 chromosomal rearrangement cases. We evaluated if the distribution of their 1032 combined breakpoints  
87 was distinctive using bootstrap simulations and found that breakpoints tend to keep away from  
88 haplosensitive genes suggesting selective pressure. We then compared their distribution with that of  
89 13,310 and 468 breakpoints of cancer complex chromosomal rearrangements and constitutional simple  
90 rearrangement samples, respectively. Both complex rearrangement groups showed breakpoint  
91 enrichment in late replicating regions suggesting similar origins for constitutional and cancer cases.  
92 Simple rearrangement breakpoints but not complex ones were depleted from lamina-associated domains  
93 (LADs), possibly as a consequence of reduced mobility of DNA ends bound to lamina.

94 The enrichment of breakpoints in late-replicating chromatin for both constitutional and cancer  
95 *chromoanagenesis* provides an orthogonal support to the premature chromosome condensation  
96 hypothesis that was put forward to explain *chromoanagenesis*.

## 97 **Introduction**

98 Since the identification of a supernumerary chromosome 21 in Down syndrome (Lejeune et al. 1959),  
99 each technological development (chromosome banding, FISH, cytogenetic microarray, massive parallel  
100 sequencing, long-read sequencing) has further exposed the complexity and variability of human  
101 chromosomes (Caspersson et al. 1970; Cooper et al. 2011; Sudmant et al. 2015). This “entropy”  
102 climaxed with the identification of extremely complex chromosomal rearrangements (CCRs) both in  
103 cancer (Stephens et al. 2011) and constitutional samples (Kloosterman et al. 2011) christened  
104 *chromothripsis*. These CCRs have their breakpoints clustered to a single chromosome, a chromosome  
105 arm or a cytoband and their copy number profile oscillating between two states (1 and 2 copies), in  
106 contrast to the classical tumorigenesis scenario. The equal amount of inverted and non-inverted  
107 breakpoint-junctions is consistent with a single catastrophic shattering event (*-thripsis* in Greek)  
108 followed by random patching through non-homologous end-joining coupled to fragment loss (Korbel  
109 and Campbell 2013). The identification of different copy number profiles and alternative replicative  
110 repairing mechanisms (Microhomology-mediated breakage induced repair (MMBIR) / Fork Stalling and  
111 Template Switching (FoSTeS)) prompted the definition of *chromoanasythesis* (Liu et al. 2011) and  
112 *chromoplexy* involving several chromosomes and only observed in cancer (Baca et al. 2013), with the  
113 three phenomena being grouped under the umbrella term *chromoanagenesis* (Holland and Cleveland  
114 2012).

115 There are two main hypotheses for the underlying mechanisms, mostly deriving from cancer cell  
116 observation and cellular models. Firstly, a non-spindle bound lagging chromosome is segregated in a  
117 micronucleus (Ganem et al. 2009) where DNA replication is deficient (Crasta et al. 2012; Terzoudi et  
118 al. 2015) generating two asynchronous compartments, the micronucleus and main nucleus. This  
119 replicating and entrapped chromosome undergoes premature chromosome condensation, which is  
120 associated with pulverization of chromatin (Kürten and Obe 1975; Obe and Beek 1975). The second  
121 model relies on the dicentric chromosomes (Titen and Golic 2008). Dicentric chromosomes can create  
122 bridges between the cytokinesis poles that can only be resolved through multiple DNA breaks  
123 (Maciejowski et al. 2015), sometimes with entrapment in a micronucleus (Pampalona et al. 2016). Other  
124 hypotheses (incomplete apoptosis (Tubio and Estivill 2011), hyperploidy (Mardin et al. 2015) or mobile  
125 elements) have also been formulated.

126 The observed continuous rather than multimodal distribution of the number of breakpoints from simple  
127 to highly complex rearrangements was suggested to mirror a common origin and mechanism (Storchová  
128 and Kloosterman 2016). Would this continuum hypothesis be correct, we would expect a similar  
129 distribution of breakpoints in simple and complex events. However, beyond low copy repeats known to  
130 be elective sites for recurrent non-allelic homologous recombination events (Stankiewicz and Lupski  
131 2002), we are ignorant about possible relationships between genomic context (sequence, genome

132 folding, genome properties) and breakage probability, and potential differences in regard to complexity  
133 of the rearrangement.

134 Here we take advantage of three cohorts of rearrangements – simple, constitutional CCRs and cancer  
135 CCRs – to assess and compare the genomic features of breakpoints and provide evidence for the  
136 previously hypothesized continuum between simple and complex events. We suggest new elements in  
137 the potential mechanisms at play.

138

## 139 **Results**

### 140 *Chromoanagenesis characterization reveals new molecular features*

141 We recruited 14 unbalanced and 6 balanced *chromoanagenesis* cases. To be included and genome  
142 sequenced unbalanced cases had to carry a minimum of 3 non-recurrent non-polymorphic CNVs  
143 identified through array-CGH on a single chromosome (potentially chromosome pair) while balanced  
144 cases with a minimum of 10 breakpoints were obtained from our translational research study (Schluth-  
145 Bolard et al. 2019). Through paired-end short-read genome sequencing, we identified thirteen to hundred  
146 breakpoints per rearrangement involving from one to fifteen chromosomes for a total of 682 breakpoints  
147 (Table 1 and Figure 1). A detailed description of each case is provided as supplementary data  
148 (Supplementary File S1).

149 This characterization effort uncovered noteworthy features. Individual 20 (I-20) carries the most  
150 complex *chromoanagenesis* described to date with a single derivative chromosome 14 made of  
151 sequences originating from 15 different chromosomes. At several chromosome 14 breakpoints, we  
152 observe a “juxtapositions of sequences” from chromosome to chromosome before joining chromosome  
153 14 again until the next “juxtaposition”. Two other single-chromosome cases (I-3 and I-7) also present  
154 with copy number gains embedded in junctions but all gains are chained and inserted as a single block.  
155 I-10 also shows a single chain of gains inserted as a block. This case is unique as the five gains all derive  
156 from chromosome 1 but are inserted in a different chromosome (chr17) close to a paracentric inversion  
157 (Figure 2). For these three cases (I-3, I-7 and I-10), the number of junctions not implicating a copy  
158 number gain boundary is very limited suggesting that a chromosome shattering is an unlikely cause.

159 Of the remaining rearrangements with multiple chromosomes implicated, I-19 carries the second most  
160 complex rearrangement with six chromosomes involved. However, his profile is very different from that  
161 of individual 20 as chromosomes 4, 13 and 14 all present with a shattered profile with at least 5  
162 breakpoints each and many junctions connecting pairs of these three chromosomes suggesting that they  
163 all had been shattered. Chromosome 11 is only involved in this rearrangement through a 6 kb duplication  
164 inserted within a derivative chromosome. I-16 (chromosomes 8 and 14) and I-18 (chromosomes 3 and  
165 10) also harbor more than one shattered chromosome.

166 Rearrangements of individuals 12, 13 and 15 are a composite of a shattered chromosome and one or two  
167 translocations, a situation compatible with a preexisting parental balanced translocation (absent here) or  
168 a two-step process during a single gametogenesis.

| Individual | No of chromosomes | No of breakpoints | Main chromosome | Copy Number Variant |                     | No of resolved junctions | No of inferred junctions | Inferred mechanism |              |           | Inferred mechanism for rearrangement |
|------------|-------------------|-------------------|-----------------|---------------------|---------------------|--------------------------|--------------------------|--------------------|--------------|-----------|--------------------------------------|
|            |                   |                   |                 | Gain in Mb (n gain) | Loss in Mb (n loss) |                          |                          | NHEJ               | MMBIR (MMEJ) | Ambiguous |                                      |
| 1          | 1                 | 14                | 3 (100%)        | 0                   | 0                   | 13                       | 4                        | 1                  | 3            | 0         | NA                                   |
| 2          | 1                 | 16                | 11 (100%)       | 2.25 (2)            | 7.15 (4)            | 9                        | 7                        | 3                  | 2            | 2         | Chromoanasythesis                    |
| 3          | 1                 | 18                | 6 (100%)        | 1.43 (7)            | 6.56 (1)            | 12                       | 9                        | 1                  | 5            | 3         | Chromoanasythesis                    |
| 4          | 1                 | 18                | 21 (100%)       | 5.30 (5)            | 11.73 (4)           | 9                        | 6                        | 5                  | 1            | 0         | Chromoanasythesis                    |
| 5          | 1                 | 23                | 5 (100%)        | 0                   | 0                   | 23                       | 18                       | 10                 | 5            | 3         | Chromothripsis                       |
| 6          | 1                 | 24                | 20 (100%)       | 6.65 (11)           | 0                   | 14                       | 10                       | 3                  | 3            | 4         | Chromoanasythesis                    |
| 7          | 1                 | 25                | 21 (100%)       | 4.54 (11)           | 0.31 (1)            | 14                       | 14                       | 3                  | 8            | 3         | Chromoanasythesis                    |
| 8          | 1                 | 62                | 7 (100%)        | 0.76 (15)           | 19.68 (3)           | 27                       | 27                       | 13                 | 7            | 7         | Chromoanasythesis                    |
| 9          | 1                 | 68                | 11 (100%)       | 8.74 (14)           | 4.40 (1)            | 52                       | 44                       | 11                 | 23           | 10        | Chromoanasythesis                    |
| 10         | 2                 | 13                | 1 (76,9%)       | 0.83 (5)            | 0                   | 8                        | 8                        | 8                  | 0            | 0         | Chromoanasythesis                    |
| 11         | 2                 | 18                | 2 (94%)         | 0                   | 2.97 (2)            | 15                       | 9                        | 3                  | 6 (1)        | 0         | Chromoanasythesis                    |
| 12         | 2                 | 46                | 3 (98%)         | 0                   | 9.00 (5)            | 48                       | 29                       | 12                 | 9            | 8         | Chromoanasythesis                    |
| 13         | 2                 | 56                | 13 (98%)        | 35.91 (15)          | 15.24 (8)           | 33                       | 31                       | 5                  | 24           | 2         | Chromoanasythesis                    |
| 14         | 3                 | 18                | 1 (72%)         | 0                   | 0                   | 16                       | 10                       | 7                  | 0            | 3         | Chromothripsis                       |
| 15         | 3                 | 23                | 2 (91,3%)       | 0                   | 0                   | 18                       | 7                        | 4                  | 3            | 0         | NA                                   |
| 16         | 4                 | 14                | 14 (43%)        | 0                   | 0                   | 14                       | 10                       | 5                  | 1            | 4         | Chromothripsis                       |
| 17         | 4                 | 19                | 6 (84%)         | 0.25 (1)            | 14.97 (6)           | 14                       | 6                        | 3                  | 3            | 0         | NA                                   |
| 18         | 5                 | 18                | 10 (56%)        | 0                   | 0                   | 16                       | 11                       | 7                  | 1            | 3         | Chromothripsis                       |
| 19         | 6                 | 84                | 4 (68%)         | 0                   | 6.26 (16)           | 71                       | 28                       | 8                  | 12 (2)       | 8         | Chromoanasythesis                    |
| 20         | 15                | 105               | 14 (67%)        | 0                   | 4.23 (15)           | 85                       | 54                       | 39                 | 5            | 10        | Chromoanasythesis                    |
|            | <b>Total</b>      | <b>682</b>        |                 |                     |                     | <b>511</b>               | <b>341</b>               | <b>151</b>         | <b>121</b>   | <b>70</b> |                                      |

169

170 **Table 1:** Rearrangements' characteristics summary.

171 We only inferred the junctions for which a same repairing mechanism was considered at both ends. Full details can be found in Supplementary File S1.



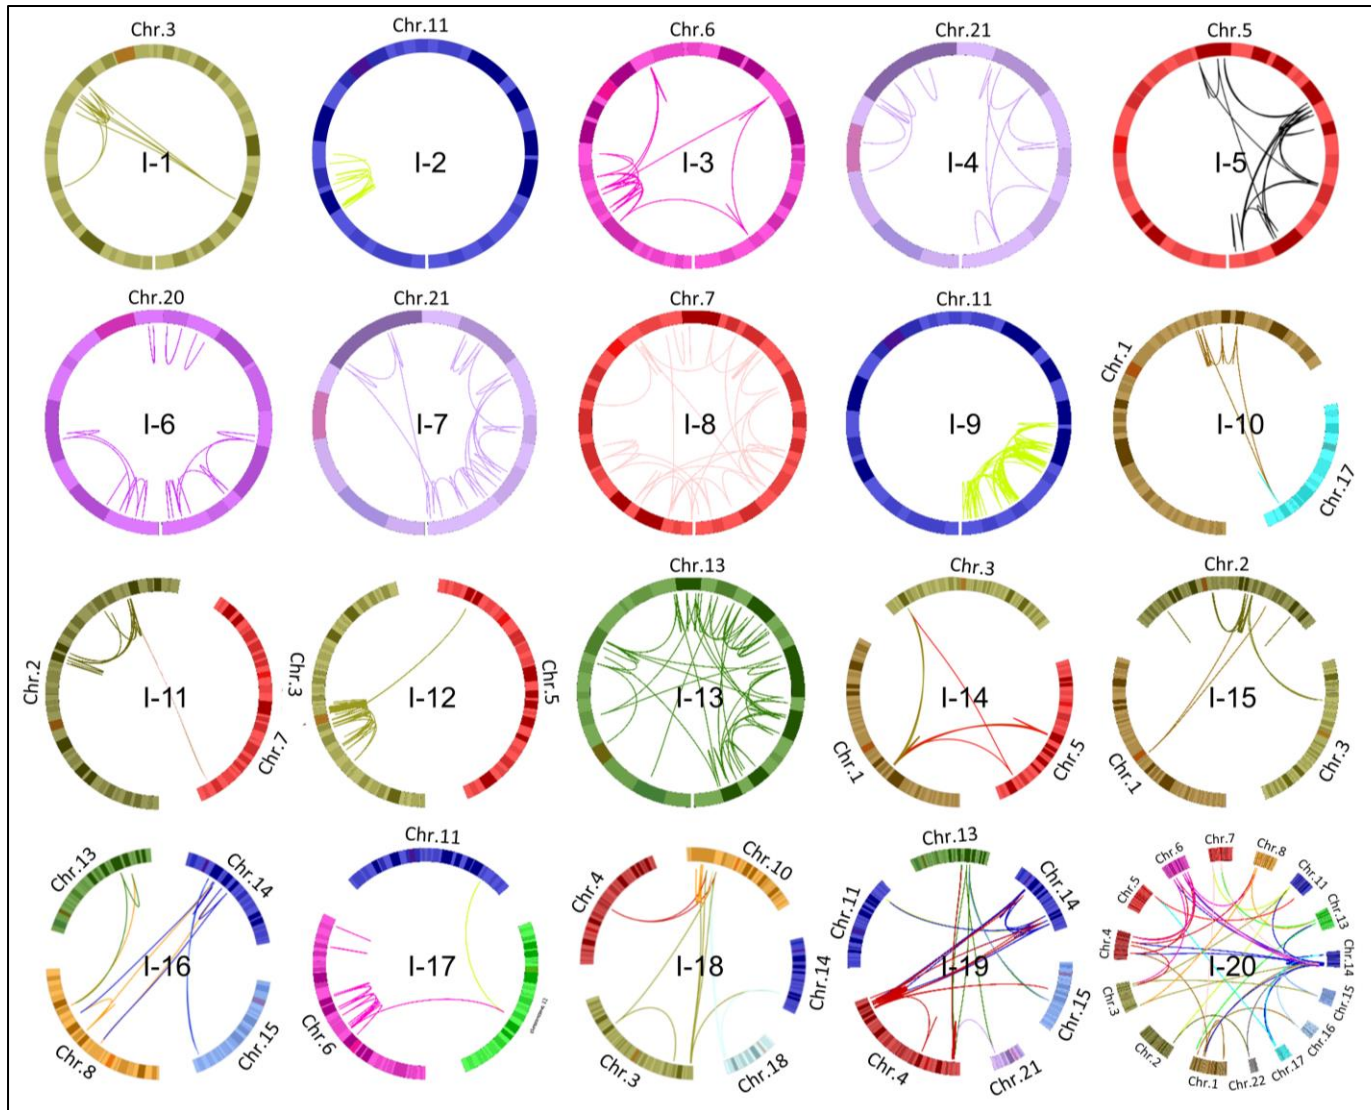

172

173

**Figure 1:** Circos plot visualization of all 20 rearrangements characterized herein. Foci of clustered breakpoints are observed in a majority of individuals.

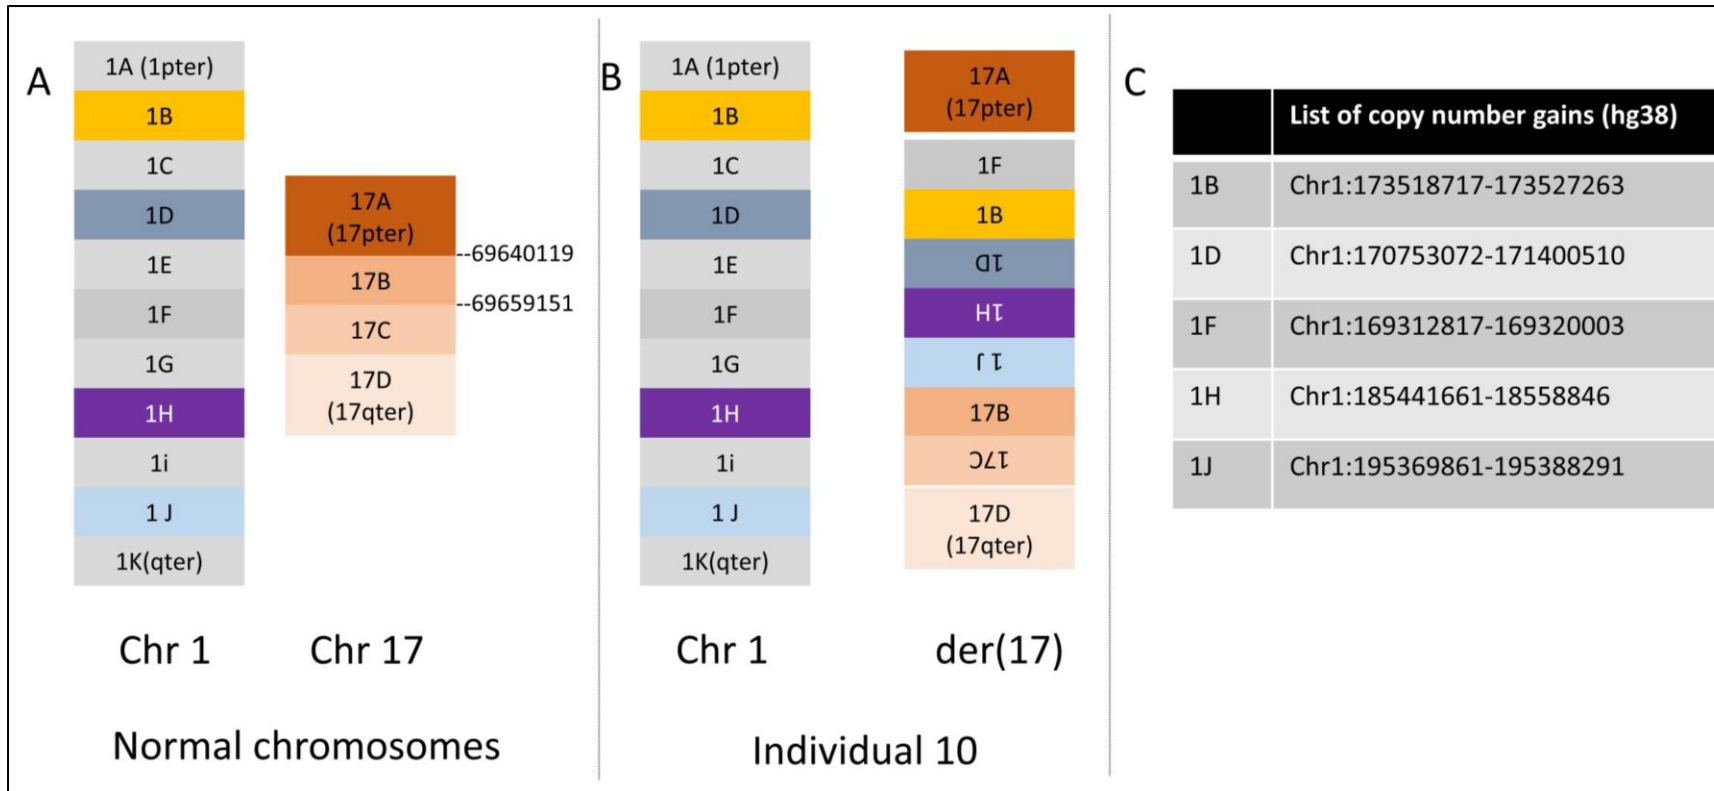

174

175 **Figure 2:** Schematic reconstruction of I-10's rearrangement: 5 sections of chromosome 1, 1F, 1B, 1D, 1H and 1J (their coordinates are indicated in panel C) are sequentially  
 176 inserted in chromosome 17 nearby a 17C paracentric inversion of this chromosome.

177

178 *Genotype/phenotype correlation*

179 All individuals, but one, of our cohort had an abnormal phenotype. I-7 was identified after a positive  
180 first trimester screening for trisomy 21 that revealed an abnormal chromosome 21. Fifteen individuals  
181 presented with different degrees of intellectual disability (ID) from mild (I-1, I-18) to severe (I-14).  
182 When present ID was associated with different congenital malformations in all individuals but I-6 and  
183 I-17. Of the four individuals without ID, two were not assessed formally as they were identified  
184 prenatally (I-13) or in the first days of life (I-12). We did not observe any correlation between the  
185 phenotype severity and the rearrangement complexity regarding either number of breakpoints, number  
186 of chromosomes involved or genomic imbalance. For several individuals the phenotype could be  
187 partially explained by the identification of disrupted genes or a position effect. *FOXP1* (Mental  
188 retardation with language impairment (MIM 613670)) (I-1), *MEF2C* (Mental retardation, autosomal  
189 dominant 20 (MIM 613443)) (I-5 and I-14), *ADNP* (Helsmoortel-van der Aa syndrome (MIM 615873))  
190 (I-6), *ZEB2* (Mowat-Wilson syndrome (MIM 235730)) and *COL3A1* (vascular Ehler-Danlos syndrome  
191 (MIM 130050)) (I-11), *YY1* (Gabriele-de Vries syndrome (MIM 617557)) (I-20) could partly drive the  
192 respective phenotypes. For I-2, 3, 4, 8, 9, 10, 12, 13, 17 and 19 no major gene could be convincingly  
193 identified as driving the phenotype but the genomic imbalance was considered large enough to be  
194 causative. The striking absence of phenotype for I-7 while she carries a total genomic imbalance of 4.85  
195 Mb on chromosome 21, not affecting the Down Syndrome critical region, could be explained by the  
196 insertion of all copy number gains together on the short arm of chromosome 21. Placed in a  
197 heterochromatin context the copy number gains could be silenced through a protective position effect.

198

199 *Repairing mechanisms are mixed within rearrangements and create “hubs”*

200 We reached nucleotide resolution in both forward and reverse directions for 511 junctions allowing  
201 inferring the repair mechanisms through analysis of junction sequence (Supplementary File S1). Using  
202 stringent inferring criteria (Online Methods), 162 out of 511 junctions could not be classified. Non-  
203 homologous end-joining (NHEJ) was inferred for 151 junctions (30%), while 121 junctions (24%) fitted  
204 with our criteria for MMBIR / FoSTeS. Three of these 121 replicative junctions could also be considered  
205 as Microhomology Mediated End Joining (MMEJ) as they had no distinctive feature for either  
206 mechanism. For 70/341 junctions (14%) we could not distinguish between NHEJ and MMBIR/FoSTeS.  
207 Using our criteria to infer subclasses of CCR we classified 13 cases as *chromoanaysynthesis* and 4 as  
208 *chromothripsis*, leaving 3 rearrangements without clear denomination, mostly due to a limited number  
209 of inferable junctions. A single rearrangement in I-10 could be fully inferred with a unique repairing  
210 mechanism (NHEJ), whereas all others presented different levels of ascertained mixed signatures and  
211 breakpoint distribution was not shown to be significantly different between the two subclasses (data not  
212 shown thus questioning the relevance of criteria used for classification and existing definitions.

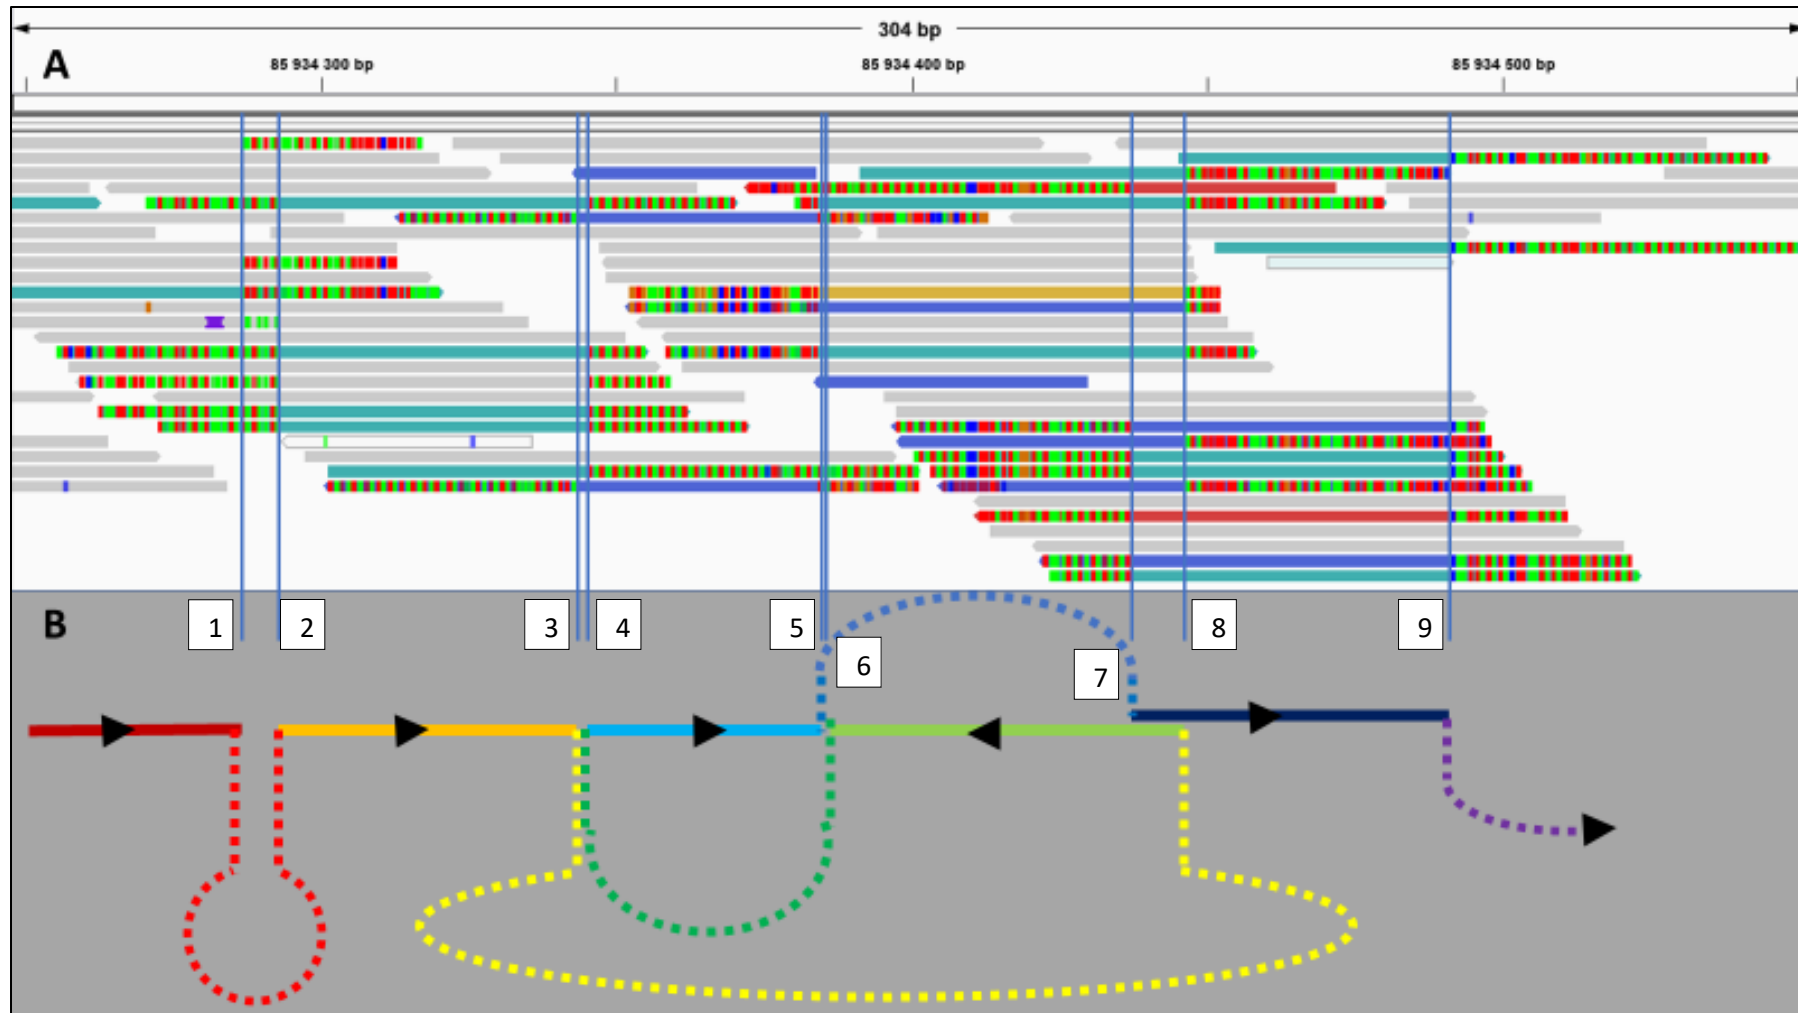

213

214 **Figure 3:** IGV browser (v2.4) view of read alignment of the largest “rearrangement hub” observed in our cohort (I-12) consisting of 9 breakpoints within a  
 215 segment of 211 nucleotides (A). Reads paired with a mate aligned to a different locus are coloured. Partial schematic reconstruction of the rearrangement with  
 216 plain lines being sequences of the “hub” and dashed-lines depicting other fragments of the rearrangement. The direction is indicated by black arrowheads (B).

217 At sequence resolution, we describe for the first time features that we name “rearrangement hubs”. They  
218 consist of short genomic intervals (<1 kb) contacted by more than four junctions each coming from a  
219 different locus and using a few dozens of nucleotides of the hub before restarting another rearrangement  
220 loop. We identified 5 of these in I-9 (n=2), 12 (n=2) and I-19 (n=1). The most complex “hub” has 12  
221 junctions within a 211 nucleotide span (I-12; Figure 3).

222

### 223 *Chromoanagenesis breakpoint distribution is not random*

224 We then investigated CCR breakpoint distribution to gain insights on potential biological mechanisms.  
225 To increase statistical power, we combined 682 breakpoints of our 20 constitutional CCRs with 350  
226 breakpoints of 20 published cases (Yang et al. 2015; Redin et al. 2017). To investigate if the mechanisms  
227 involved in constitutional and cancer CCRs are similar we compared the distribution of these 1032  
228 breakpoints to that of 13,310 breakpoints of cancer CCRs deposited in ChromothripsisDB (Yang et al.  
229 2015). We also compared their distribution with that of 468 breakpoints of 234 simple rearrangements  
230 described in (Redin et al. 2017) and (Schluth-Bolard et al. 2019) to test the possible continuum from  
231 simple to complex rearrangements. We assessed if the breakpoint distribution of these three different  
232 groups of rearrangements were enriched within diverse genomic features, such as haplosensitive genes,  
233 repeated elements, G-band staining, chromosomal fragile sites, A/B chromatin compartments, lamina  
234 associated domains (LADs), topologically associating domains (TADs), replication origins and  
235 replication timing. We are aware that these variables are not independent, LADs, for example, are known  
236 to be late-replicating gene poor regions (Supplementary Figure S1). Direction of the distribution  
237 (enrichment/depletion) were gauged by comparing to two distinct breakpoint simulations (see Online  
238 Methods). All annotations are presented in Supplementary Table S1.

239 First, through univariate analysis, we observed a depletion of both gene-disrupting (Relative Risk Ratio  
240 (RRR) = 0.818, Confidence Interval 95% [CI95%] : [0.722-0.927]) and TAD-disrupting (RRR = 0.867  
241 [0.767-0.980]) breakpoints in constitutional CCRs (Figure 4 and Supplementary Table S2). In addition  
242 to a massive genomic imbalance, we surmise that the accumulation of disrupted or dysregulated genes  
243 would reduce fitness. For simple rearrangements gene-disrupting breakpoints tend to affect  
244 haplosensitive genes (higher loss-of-function intolerance (pLI); RRR= 2.267 [1.637-3.137]), probably  
245 mirroring the ascertainment bias in recruiting these affected individuals. On the contrary we observed a  
246 depletion of high pLI genes in CCRs (RRR= 0.746 [0.585-0.952]), suggesting that their pathologies  
247 have an oligogenic basis with multiple breakpoint and CNVs contributing and/or that affecting multiple  
248 high pLI genes is incompatible with life. Finally, we observed a significant enrichment in genes and  
249 TADs in cancer CCRs (RRR = 1.070 [1.034-1.108] and 1.113 [1.075-1.153] respectively) consistent  
250 with a distribution driven by oncogenic forces rather than selective pressure.

251 Aside from selective pressure consequences, we identified several genomic features affecting breakpoint  
252 distribution. To jointly assess the covariables and confounders (including selective pressure elements)  
253 we built a multinomial logistic regression to model the type of rearrangement that originates the  
254 breakpoint with the presence/absence of repeated elements, genes, lamina associated domain, and  
255 topologically associating domain, the type of chromatin compartment, G-band staining, replication  
256 timing status and distance to replication origin (Table 3). In this model, replication timing appears as  
257 the unique significant element in the three groups, indeed chromosomal breakpoints are enriched in late-  
258 replicating chromatin (RRR = 3.713 [2.583-5.338] for constitutional CCRs; RRR = 1.431 [1.303-1.572]  
259 for cancer CCRs; RRR = 2.149 [1.259-3.668] for simple rearrangements) (Figure 5 and Supplementary  
260 Table S3).

261 For constitutional *chromoanagenesis*, beyond replication timing, depletion in genes (RRR = 0.605  
262 [0.454-0.806]) and enrichment in open chromatin regions (RRR = 1.553 [1.129-2.137]) appear as other  
263 significant elements. For cancer rearrangements, none of the analyzed covariables but repeated element  
264 disruption was significantly different from simulations so that breakpoint distribution is close to random  
265 once adjusted for replication timing.

266 Finally, while late-replication is known to be a characteristic of LADs, simple rearrangements'  
267 breakpoints appeared depleted within LADs (RRR= 0.466 [0.266-0.816]). Conversely, complex  
268 rearrangements' breakpoints were independent of LADs as their distribution is comparable to breakpoint  
269 simulation (RRR= 0.987 [0.905-1.077] and 0.935 [0.679-1.289] for cancer and constitutional cases  
270 respectively). Our results suggest that preference towards non-peripheral, i.e. non lamina-associated,  
271 chromatin appears as the unique criterion distinguishing the distribution of simple rearrangement  
272 breakpoints from that of complex cases that are naive to this feature.



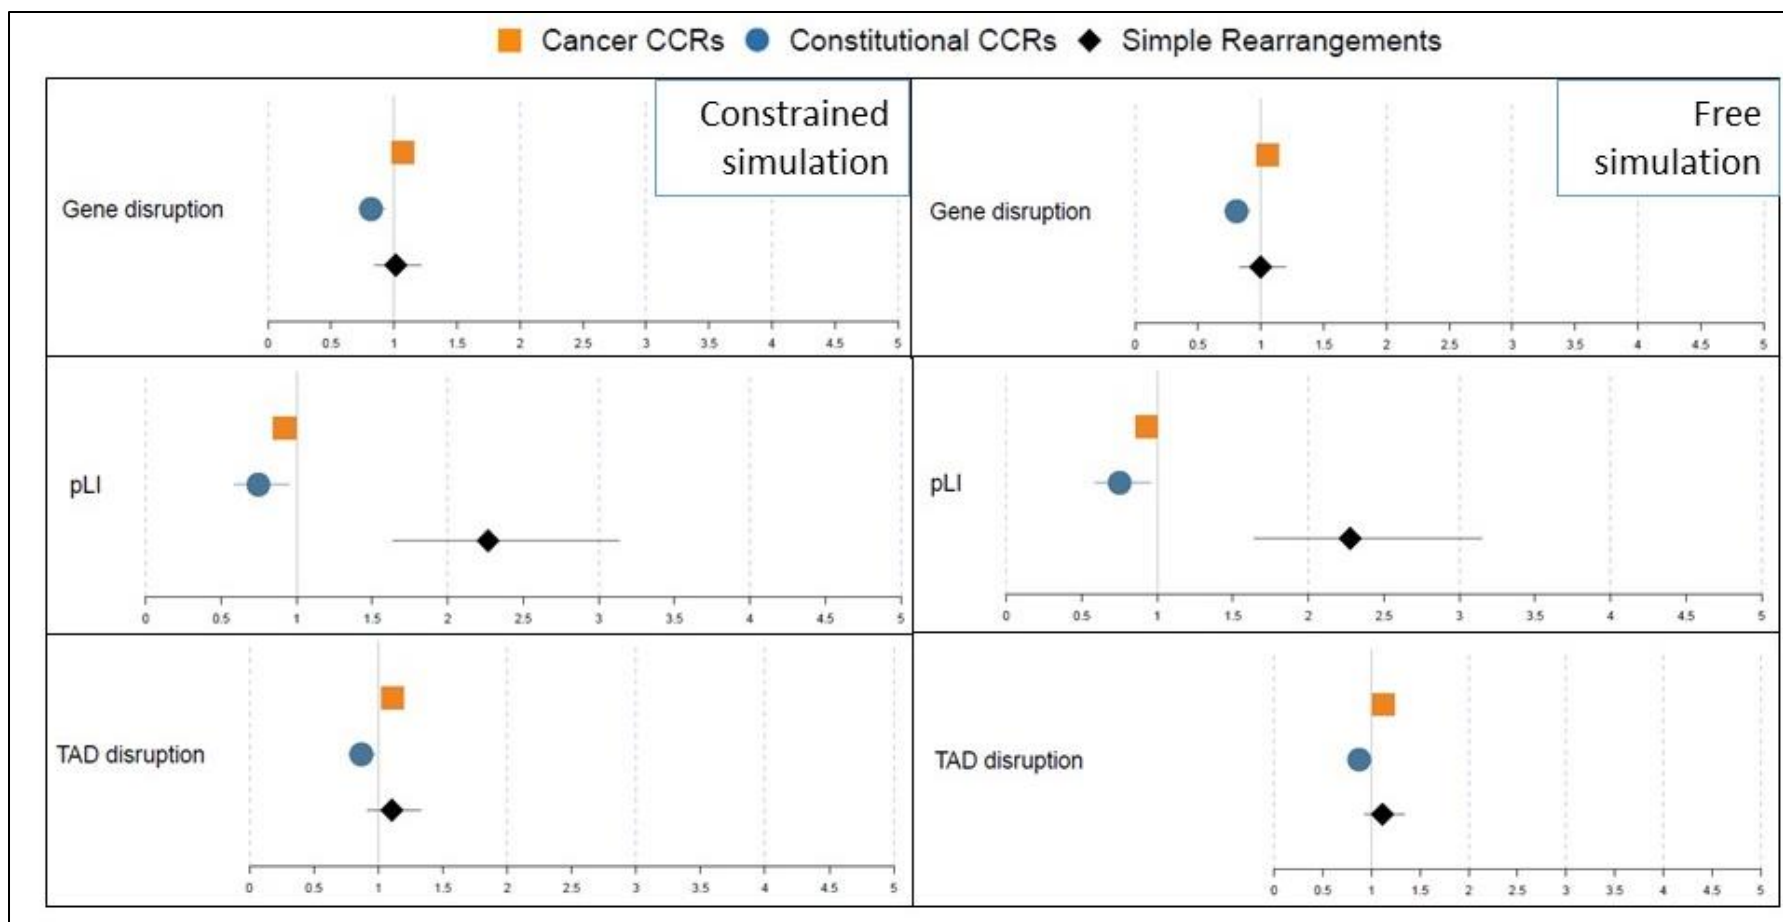

273

274 **Figure 4:** Univariate logistic regression model of breakpoint distribution of simple rearrangements, cancer and constitutional CCRS. These distributions are  
 275 compared to constrained (left panel) and free simulated distributions (right). Enrichment in genes (top), haplosensitive genes (middle) and TADs (bottom) are  
 276 shown. Detailed results are presented in table S2. Constitutional complex rearrangements are depleted in gene-disrupting and TAD-disrupting breakpoints as a  
 277 possible consequence of purifying selection. Simple rearrangements' breakpoints are enriched in haploinsufficiency intolerant genes possibly reflecting a  
 278 selection bias towards phenotypically abnormal individuals.

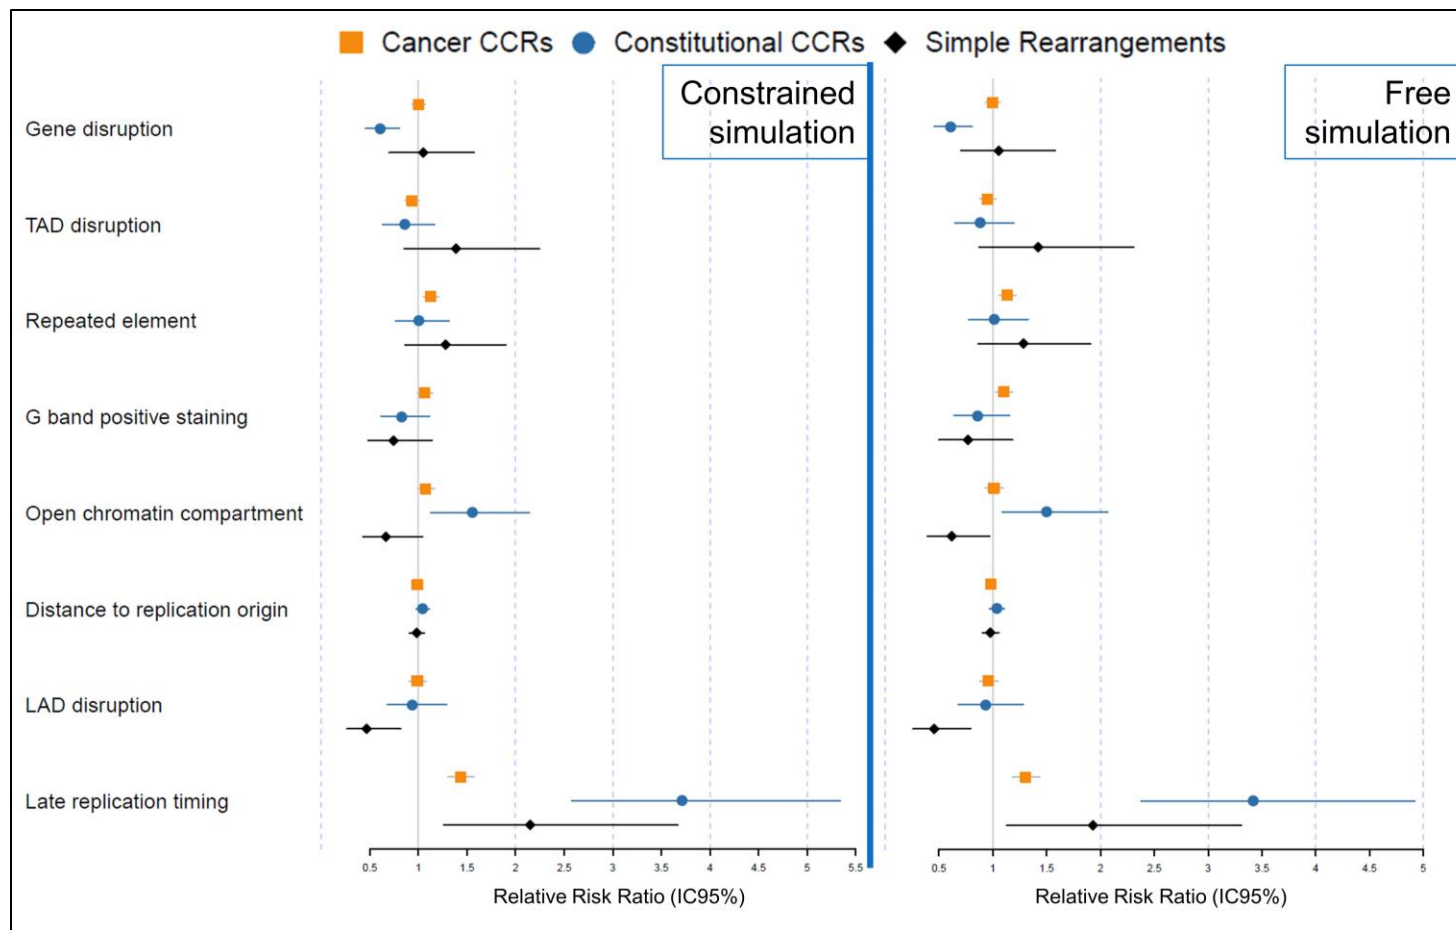

279

280 **Figure 5:** Result of the multinomial logistic regression model of breakpoint distribution of simple rearrangement, cancer and constitutional CCRs. These  
 281 distributions are compared to constrained (left panel) and free simulated distributions (right) (relative risk ratios and 95% confidence intervals). Distance to  
 282 replication origin was log-transformed. Late replication timing is the only significant variable for all three groups. The logistic regression model presented is the  
 283 addition of each covariable that has the lowest Akaike information criterion tested (AIC = 36663,63 and 36558.53 for constrained and free simulation as reference  
 284 group respectively



## 285 Discussion

286 With a total of 20 cases, this is the biggest cohort of constitutional CCRs to date offering new insights  
287 on the origins and mechanisms of such rearrangements *in vivo*. Interestingly, of the 13 rearrangements  
288 we included based on their abnormal array-CGH result, they all presented additional breakpoints and  
289 complexity. The coincidence of three non-recurrent non-polymorphic CNVs identified during array-  
290 CGH on a single chromosome is a good indication for an unbalanced CCR requiring genome sequencing  
291 for detailed characterization. Of note, paired-end short-read sequencing identifies only 91% of  
292 karyotype-visible breakpoints (Redin et al. 2017) suggesting that an extra loop of junctions cannot be  
293 ruled out in our “solved” cases.

294

295 Our characterization effort challenged several literature definitions. First, we could not disentangle  
296 situations where gains are inserted in a single block (I-3, 7 and 10) from replicative repair of a high  
297 number of breakpoints in a single chromosome “using” a variety of other chromosomes. This situation  
298 questions the definition of *chromoanagenesis* subgroups as it implies a grey zone between  
299 *chromothripsis* and *chromoanasythesis*. In *chromoanasythesis*, the complexity rather than resulting  
300 from chromosome shattering is the consequence of a DNA break. Alternatively, it could stem from a  
301 simple replication fork stalling resolved “using” other sequences of the genome through a replicative  
302 process (MMBIR/FoSTeS) (Holland and Cleveland 2012; Liu et al. 2011). Thus, what we observe  
303 through genome sequencing can either be a DNA breakpoint or a DNA join point. The fact that none of  
304 the eight junctions resolved for individual 10 could be inferred as replicative questions our ability to  
305 identify a repairing mechanism and differentiate breakpoints from join points. In this “grey zone”, a  
306 shattering event seems likely but junction sequences present distinct signs from the classical non-  
307 homologous end joining of *chromothripsis* (Kloosterman et al. 2011; Chiang et al. 2012).

308 Second, we describe a new feature of complex rearrangements that we name “repairing hubs”, where a  
309 single locus is “used” several times within the derivative chromosome. We identified five hubs in 3 out  
310 of 20 cases; they have no common feature except for G-band positive staining. It will be of particular  
311 interest to collect additional observations and further investigate the genomic features shared by these  
312 loci. Slamova *et al.* pointed that extremely short sequences can be handled, and here even spread  
313 throughout a chromosomal rearrangement, challenging the 50 bp definition of a structural variant  
314 (Slamova et al. 2018; Sudmant et al. 2015).

315 Third, whereas *chromothripsis* has often been used to designate all kinds of *chromoanagenesis* (Redin  
316 et al. 2017; Collins et al. 2019; Pellestor 2014; Fukami et al. 2017) our identification of only a few clear  
317 cut *chromothripsis* cases in our constitutional cohort suggests that such oversimplification should be  
318 avoided.

319 Apart from variables affected by selective pressure we could not distinguish constitutional  
320 *chromoanagenesis* from cancer cases. This suggests that the shattering scenario is comparable for  
321 constitutional and tumoral cases. However, while the influence of each variable goes in the same  
322 direction for both cancer and constitutional cases, the observed driving forces are still of different  
323 magnitude. We hypothesize that this could result from additional complexity delineating possible  
324 subgroups. Drier *et al.* have previously shown that cancer rearrangements' breakpoints have a bimodal  
325 distribution, some cancers having breakpoints in early-replicating, highly expressed, GC-rich chromatin  
326 while others had their breakpoints preferentially positioned in late-replicating, low transcribed, GC-poor  
327 chromatin (Drier et al. 2013). Focusing on CCRs, breakpoints of sarcoma samples are enriched in early-  
328 replicating chromatin (Anderson et al. 2018) in contrast to our finding from pooling all cancers together.

329 By opposition to simple rearrangements, complex rearrangements' breakpoints appear independent from  
330 LADs. First, this is in favor of the micronucleus hypothesis as it was shown that LADs are lost in a  
331 majority of micronuclei (Hatch et al. 2013). Second, this draws a demarcation line in the supposed  
332 continuum between simple and complex rearrangements emphasizing differences in underlying  
333 mechanisms. This LAD depletion is counter-intuitive as, first, the peripheral chromatin was used to be  
334 considered as a "body-guard", absorbing mutagens to the inner chromatin (Hsu 1975) and second,  
335 selective pressure should contribute to keep structural variants towards the nuclear periphery as it is both  
336 gene-poor and less transcriptionally active.

337 Simple rearrangements are formed after the mobilization and incorrect pairing of two DNA double  
338 strand breaks. This mobilization is restricted to a limited volume so that the pairs formed belong to  
339 neighboring chromosomal territories (Soutoglou et al. 2007). Being peripheral a DNA break in a LAD  
340 has, by definition, a reduced number of potential partners. DNA breaks in LADs are not mobilized  
341 towards nuclear positions more favorable to homologous recombination (Lemaître et al. 2014). Their  
342 mobilization capacity might even be reduced by their interaction with lamina, once again reducing their  
343 ability to pair with another genomic locus. Overall, we suspect that DNA breaks occurring in LADs are  
344 as frequent as elsewhere in the genome but have more chance to be repaired to their native partner than  
345 to create a rearrangement compared to "central chromatin". These events could only be identified at  
346 sequence resolution with repairing sequence scars.

347 In our analysis, late replication timing appears as a key risk factor for *chromoanagenesis* and  
348 chromosomal breakage more broadly as it is for other types of genomic variation. It was first associated  
349 with important variations in SNP-density across evolution and cancer development with 2-fold and 6-  
350 fold enrichment for transitions and transversions mutations respectively (Koren et al. 2012), but profiles  
351 are similar in germline and cancer cells (Liu et al. 2013). One possible explanation is that error-prone  
352 repairing mechanisms are more active in late replication (Polymerase  $\theta$ ) while early-replicating gene-  
353 dense chromatin benefits from high fidelity transcription-coupled nucleotide excision repair (Waters

354 and Walker 2006). Interestingly, polymerase  $\theta$  had previously been considered to explain the features  
355 observed in a *chromoanagenesis* case (Masset et al. 2016). CNV distribution was also reported to be  
356 influenced by replication timing, gains and losses being enriched in early and late regions respectively  
357 in cancer cells, with breakpoints being part of the same replicating domain. However, to date, there is  
358 no robust explanation for such findings (De and Michor 2011). Finally, if partners of balanced  
359 rearrangements preferentially replicate at the same time (Ryba et al. 2010) preference towards late  
360 replicating regions had never been reported before.

361 Observation of a breakpoint enrichment in late replicating chromatin supports the “Prematurely  
362 Condensed Chromosome” hypothesis for chromoanagenesis. Indeed, our scenario for  
363 *chromoanagenesis*, presented in Figure 6, is that after one (or a few) chromosome(s) gets trapped in a  
364 micronucleus it can only replicate more slowly than the main nucleus. While entering the next cell  
365 division, replication is not completed in the micronucleus and the entrapped material has to start  
366 condensation prematurely. This generates a stress on replication forks still present in the physiologically  
367 late replicating regions of this delayed chromosome. The forks would either collapse and provoke DNA  
368 breakage or stall and start FoSTeS cycles. This would explain the co-occurrence of different repairing  
369 mechanisms observed in a same rearrangement. The rearrangement puzzle will be reassembled after  
370 reintegration within the main nucleus, opening the possibility for FoSTeS loops to use other  
371 chromosomes.

372 Finally, the low proportion of rearrangements affecting two chromosomes and the importance of  
373 replication-timing is not in favor of a telomere crisis scenario that would involve a dicentric  
374 chromosome. Indeed, this second hypothesis can explain clustered breakpoints on a maximum of two  
375 chromosomes but requires deficiencies of important cell cycle regulators (*RB*, *TP53*) that are relatively  
376 unlikely during gametogenesis considering constitutional cases. Instead, several rearrangements present  
377 a single junction between a shattered chromosome and another one suggesting the preexistence of a  
378 balanced translocation. While no constitutional CCR has been described in offspring of simple balanced  
379 rearrangement carrier such event could happen in the same gametogenesis and favor entrapment of one  
380 chromosome of the tetravalent in a micronucleus.

381 Overall, we highlight the importance of precise characterization of CCRs as we identified (i)  
382 rearrangement “hubs” that had not been described previously and (ii) a “grey zone” between  
383 *chromothripsis* and *chromoanasyntesis* challenging actual definitions. By extensive annotation of the  
384 largest cohort of constitutional CCRs and use of publicly available data, we identify replication timing  
385 as a new element driving chromosomal breakpoint probability. Our *in vivo* dataset supports the  
386 implication of premature condensation of genetic material segregated in a micronucleus in  
387 *chromoanagenesis*. Finally, we identify a statistically significant depletion of simple rearrangements’  
388 breakpoints within LADs. This strongly suggests that *chromoanagenesis* and simple rearrangements are

389 not part of a continuous spectrum and opens new perspectives towards chromosomal rearrangement  
390 understanding.

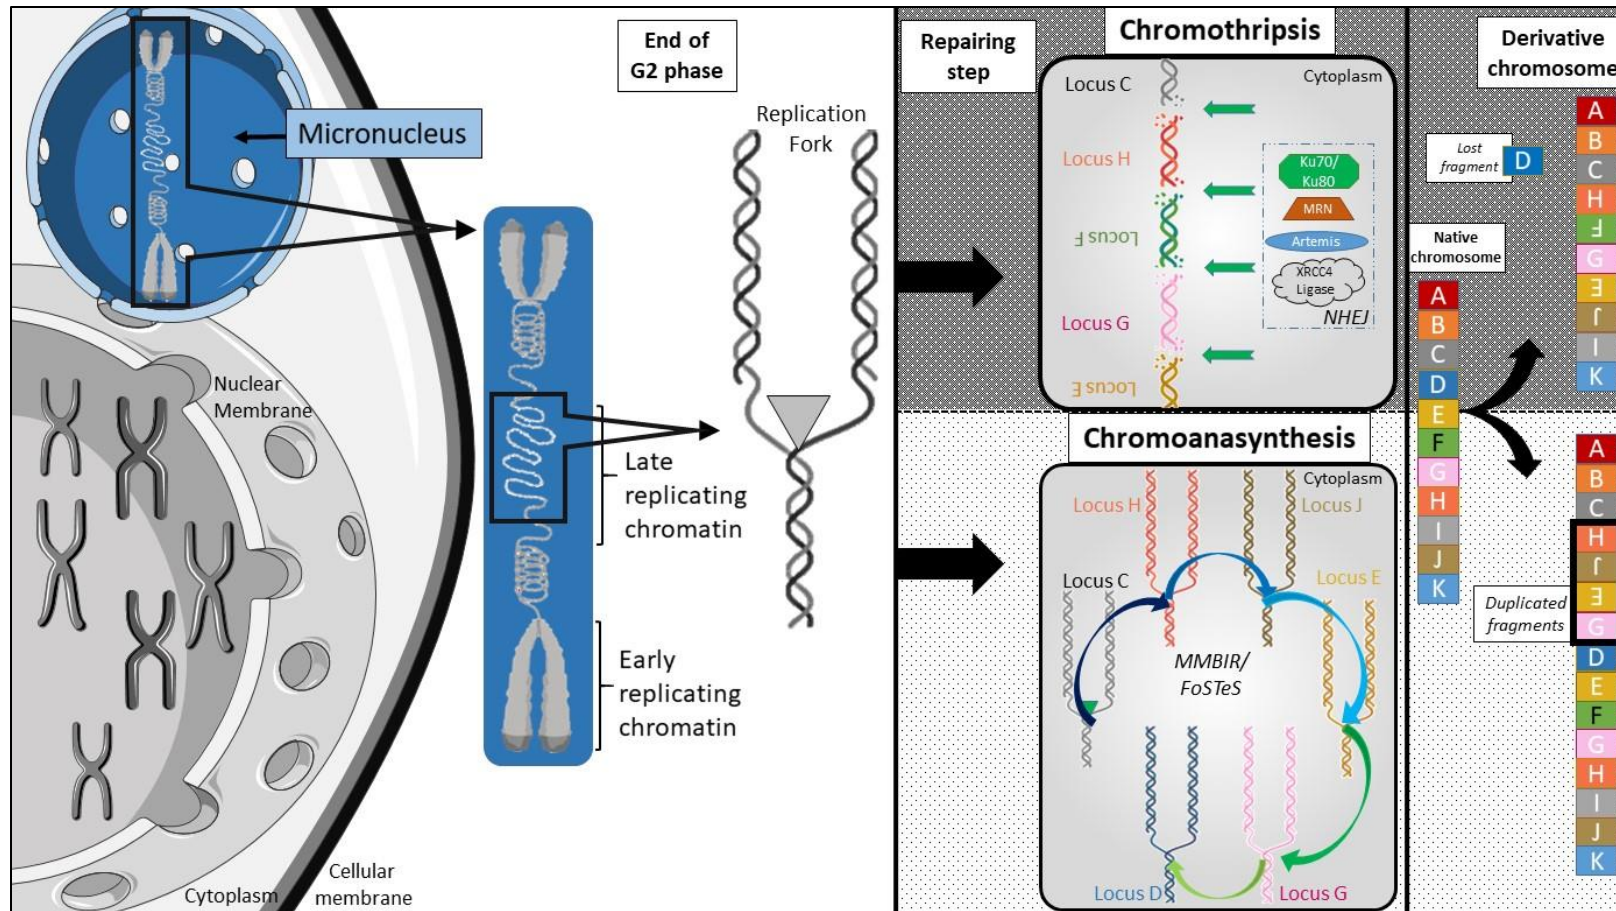

391

392 **Figure 6:** Schematic summary of our scenario to explain chromoanagenesis breakpoint distribution. After missegregation within a micronucleus, DNA  
 393 replication is delayed. While other chromosomes are ready for cell division, still active replication forks in constitutively late replicating regions are subject to  
 394 premature condensation and will either collapse (and create DNA double strand breaks) or stall (with possible FoSTeS events) so that both mechanisms can be  
 395 observed in a single rearrangement.



## 396 **Online Methods**

### 397 *Individuals*

398 To recruit CCRs we first initiated a French-national call for collaboration to gather all cases analyzed  
399 using cytogenetic microarray and having a minimum of 3 non-polymorphic, non-recurrent copy number  
400 variants on a single chromosome (potential pair of chromosomes). Individual 10 was recruited to the  
401 ethically approved study *Genetic basis of craniofacial malformations* (London - Riverside REC  
402 09/H0706/20) and included after genome sequencing results fitting the entry criterion. In addition, we  
403 included all balanced rearrangements characterized in our laboratory as part of our routine activity  
404 having more than 10 breakpoints.

405 All individuals or their parents gave written informed consent for this study, which was conducted with  
406 respect to the recommendations of the Helsinki Declaration. Noteworthy, balanced rearrangements had  
407 previously been published as part of our clinical validation study (Schluth-Bolard et al. 2019). Individual  
408 20's description has been recently reported (Ader et al. 2019).

409

### 410 *Genome sequencing*

411 All cases, but case 10, were genome sequenced using our validated approach (Schluth-Bolard et al.  
412 2019). After PCR-free library preparation (Nano, Illumina Inc., San Diego, CA, USA), 2x101 bp paired-  
413 end sequencing was performed on a 300 cycles High Output FlowCell for NextSeq500 instrument  
414 (Illumina, Inc.). Additionally, samples from individuals I-19, 2, 3, 6, 9, 10 and 19 were 2x151 bp paired-  
415 end sequenced on a HiSeq X5 or a HiSeq4000 instrument (Illumina Inc.). Breakpoints were detected  
416 using BreakDancer v1.4.5 (Chen et al. 2009) and ERDS v1.1 software was used for CNV calling (Zhu  
417 et al. 2012). For all calls, supporting alignment data was systematically inspected using the IGV v2.4  
418 software with soft-clipped reads set as visible (Robinson et al. 2011). At each breakpoint, split-reads  
419 were extracted manually to align the soft-clipped sequence using BLAT and obtain fragment junction  
420 sequence directly (Kent 2002). For all junctions, the process was repeated in both directions of the  
421 junction.

422

### 423 *Breakpoint and junction annotation*

424 Considering extreme complexity, all breakpoints within a kilobase were considered as one for further  
425 analyses. We annotated each breakpoint with publicly available datasets using Svagga  
426 (<https://gitlab.inria.fr/NGS/svagga>). RefSeq genes coordinates were extracted from the UCSC Genome  
427 Browser; pLi scores were extracted from the gnomAD dataset (Lek et al. 2016). Annotation was also  
428 made across lamina associated domains (LADs) (Guelen et al. 2008); topologically associated domains

429 (TADs) (Rao et al. 2014); repeated elements (RepeatMasker); chromosomal cytoband and Giemsa  
430 staining (Furey and Haussler 2003); chromosomal common fragile sites (Fungtammasan et al. 2012);  
431 replication origins (Massip et al. 2019); A/B compartments (Fortin and Hansen 2015) and replication  
432 timing (Dixon et al. 2018). For the latter, only constitutive early and late domains were considered. Both  
433 strands of a junction had to be inferred with the same mechanism following the same criteria as in  
434 (Schluth-Bolard et al. 2019) to be considered.

435 Based on existing literature, we established a decisional algorithm to infer the *chromoanagenesis*  
436 subgroup for each rearrangement as a whole (Korbel and Campbell 2013; Liu et al. 2011; Baca et al.  
437 2013; Holland and Cleveland 2012). First, rearrangements presenting several copy number gains were  
438 classified as *chromoanasyntesis* as the concept of *chromothripsis* does not foresee genomic gains.  
439 Second, the rearrangement was considered as *chromothripsis* or *chromoanasyntesis* depending on the  
440 dominant repairing mechanism (NHEJ for *chromothripsis*; MMBIR/FoSTeS or clear FoSTeS events  
441 with several shifts for *chromoanasyntesis*) with a minimum of 8 inferred junctions to qualify the  
442 rearrangement.

443

#### 444 *External cases*

445 To increase statistical power we extended our analysis to other complex rearrangements and used  
446 ChromothripsisDB (Yang et al. 2015). We downloaded the complete database and kept for analysis  
447 samples that had been genome sequenced using paired-end sequencing and for which breakpoint  
448 positions were available. We filtered out every call that was (i) not on chromosomes involved in the  
449 rearrangement as described by initial authors; (ii) of uncertain position as they had ‘start’ and ‘stop’  
450 positions distant more than 1 kb. We finally extended our cohort of constitutional CCRs with a few more  
451 recent constitutional cases (Redin et al. 2017) absent from ChromothripsisDB for a total of 20 external  
452 cases (350 breakpoints). Before pooling all constitutional CCRs, we confirmed that our dataset was  
453 similar to published cases when considering breakpoint distribution. Compared to simulation data, both  
454 distributions were either not significant or in the same direction considering individual genomic features  
455 (Supplementary Figure S2).

456 Constitutional simple rearrangements published in (Schluth-Bolard et al. 2019) and (Redin et al. 2017)  
457 were pooled in a third group distinct from (a) constitutional and (b) cancer CCRs.

458

#### 459 *Breakpoint simulation*

460 We performed *in silico* breakpoint simulation to create a null hypothesis of breakpoint distribution. We  
461 used R software for two different Monte Carlo simulations. In both cases, a random number of

462 breakpoints between 10 (minimal number of breakpoints we used to consider a *chromoanagenesis*) and  
463 1000 were picked for 1000 simulations. In the first “free” simulation, each breakpoint could occur in  
464 every possible position of the genome. In the “constrained” model, to mimic the observed “geographical  
465 clustering” of breakpoints, a random percentage between 50 and 100% of breakpoints had to occur in  
466 the same chromosome while the remaining ones were free. As we know that some genomic regions are  
467 poorly analyzed for structural variants, we used the “DangerTrack” bed file (Dolgalev et al. 2017) to  
468 exclude all breakpoints simulated in these regions and be comparable with the observed dataset. A single  
469 breakpoint of our in-house dataset overlaps the DangerTrack. Overall, 399,346 and 399,915 breakpoints  
470 were simulated and used for analyses for the “free” and “constrained” models respectively.

471

#### 472 *Statistical analysis*

473 All statistical analyses were performed using R software v.3.5.2. Univariate analysis of each predictor  
474 and the logistic regression model building was performed using the “multinom” function of the “nnet”  
475 R package (Ripley and Venables 2016) as the Y outcome is multinomial. The Wald test was used for p-  
476 value calculation. Considering the number of variables and hypotheses tested we considered  $p < 0.01$   
477 for statistical significance.

478

#### 479 **Data access**

480 All sequencing data generated were obtained from patients in a diagnostic setting and can be shared  
481 individually upon reasonable request for patients that had consented data sharing.

482

#### 483 **Acknowledgments**

484 The authors would like to thank members of the AchroPuce network for their thorough collaboration.  
485 NC acknowledges « Fondation Thérèse et René Planiol », Réseau Régional de Rééducation et de  
486 Réadaptation Pédiatrique en Rhône Alpes, IDEX Lyon and Hospices Civils de Lyon. GG is recipient of  
487 a Pro-Women Scholarship from the Faculty of Biology and Medicine, University of Lausanne. This  
488 work was supported by grants from the Swiss National Science Foundation (31003A\_182632) and  
489 Horizon2020 Twinning project ePerMed (692145) to AR, NHR Oxford Biomedical Research Centre  
490 based at Oxford University Hospitals NHS Trust and University of Oxford to AOMW, the Fondation  
491 Maladies Rares (WGS20140103) to DS, from the French Ministry of Health (DGOS) and the French  
492 National Agency for Research (ANR) (PRTS 2013: PRTSN1300001N) to CSB. Patient 10’s whole  
493 genome sequencing was funded by independent research commissioned by the Health Innovation  
494 Challenge Fund (JCT), a parallel funding partnership between Wellcome (WT 100127) and the UK



495 Department of Health (R6-388). The views expressed in this publication are those of the authors and not  
496 necessarily those of Wellcome, NHS, the NIHR or the Department of Health.

497

#### 498 **Author Contributions**

499 Nicolas Chatron, Pierre-Antoine Rollat Farnier, Flavie Diguët, Tony Yammine, Kevin Uguen, Zohra-  
500 Lydia Bellil, Julia Lauer Zillhardt, Arthur Sorlin performed the experiments and analyzed the data.  
501 Nicolas Chatron, Giuliana Giannuzzi, Claire Bardel, and Eleonora Porcu performed statistical analyses.  
502 Flavie Ader, Alexandra Afenjar, Joris Andrieux, Eduardo Calpena, Sandra-Chantot-Bastaraud, Patrick  
503 Callier, Nora Chelloug, Emilie Chopin, Marie-Pierre Cordier, Christèle Dubourg, Laurence Faivre,  
504 Françoise Girard, Solveig Heide, Yvan Herenger, Sylvie Jaillard, Boris Keren, Samantha J. L. Knight,  
505 James Lespinasse, Laurence Lohmann, Nathalie Marle, Reza Maroofian, Alice Masurel-Paulet, Michèle  
506 Mathieu-Dramard, Corinne Metay, Alistair T. Pagnamenta, Marie-France Portnoï, Fabienne Prieur,  
507 Marlène Rio, Jean-Pierre Siffroi, Stéphanie Valence, Jenny C. Taylor, Andrew O. M. Wilkie, Patrick  
508 Ederly enrolled patients in the study, collected the clinical data, and analyzed the data. N. Chatron,  
509 Giuliana Giannuzzi, Caroline Schluth-Bolard and Alexandre Reymond drafted the manuscript. Damien  
510 Sanlaville, Andrew O. M. Wilkie, helped in revising and editing the manuscript. All the authors  
511 approved the manuscript submission.

512

#### 513 **Disclosure declaration**

514 The authors have no conflict of interest to declare.

#### 515 **References**

516 Ader F, Heide S, Marzin P, Afenjar A, Diguët F, Chantot Bastaraud S, Rollat-Farnier P-A, Sanlaville  
517 D, Portnoï M-F, Siffroi J-P, et al. 2019. A 14q distal chromoanagenesis elucidated by whole  
518 genome sequencing. *Eur J Med Genet* 103776.

519 <https://linkinghub.elsevier.com/retrieve/pii/S1769721218305949> (Accessed September 30,  
520 2019).

521 Anderson ND, Borja R de, Young MD, Fuligni F, Rosic A, Roberts ND, Hajjar S, Layeghifard M,  
522 Novokmet A, Kowalski PE, et al. 2018. Rearrangement bursts generate canonical gene fusions in  
523 bone and soft tissue tumors. *Science* **361**.

524 <https://www.ncbi.nlm.nih.gov/pmc/articles/PMC6176908/> (Accessed September 5, 2019).

525 Baca SC, Prandi D, Lawrence MS, Mosquera JM, Romanel A, Drier Y, Park K, Kitabayashi N,  
526 MacDonald TY, Ghandi M, et al. 2013. Punctuated evolution of prostate cancer genomes. *Cell*  
527 **153**: 666–77. <https://linkinghub.elsevier.com/retrieve/pii/S0092867413003437> (Accessed

- 528 December 15, 2015).
- 529 Caspersson T, Zech L, Johansson C. 1970. Differential binding of alkylating fluorochromes in human  
530 chromosomes. *Exp Cell Res* **60**: 315–9. <http://www.ncbi.nlm.nih.gov/pubmed/5422961>  
531 (Accessed June 22, 2019).
- 532 Chen K, Wallis JW, McLellan MD, Larson DE, Kalicki JM, Pohl CS, McGrath SD, Wendl MC,  
533 Zhang Q, Locke DP, et al. 2009. BreakDancer: an algorithm for high-resolution mapping of  
534 genomic structural variation. *Nat Methods* **6**: 677–81. <http://dx.doi.org/10.1038/nmeth.1363>  
535 (Accessed December 15, 2015).
- 536 Chiang C, Jacobsen JC, Ernst C, Hanscom C, Heilbut A, Blumenthal I, Mills RE, Kirby A, Lindgren  
537 AM, Rudiger SR, et al. 2012. Complex reorganization and predominant non-homologous repair  
538 following chromosomal breakage in karyotypically balanced germline rearrangements and  
539 transgenic integration. *Nat Genet* **44**: 390–7, S1.  
540 [http://www.pubmedcentral.nih.gov/articlerender.fcgi?artid=3340016&tool=pmcentrez&rendertype](http://www.pubmedcentral.nih.gov/articlerender.fcgi?artid=3340016&tool=pmcentrez&rendertype=abstract)  
541 [pe=abstract](http://www.pubmedcentral.nih.gov/articlerender.fcgi?artid=3340016&tool=pmcentrez&rendertype=abstract) (Accessed January 2, 2016).
- 542 Collins RL, Brand H, Karczewski KJ, Zhao X, Alföldi J, Khera A V., Francioli LC, Gauthier LD,  
543 Wang H, Watts NA, et al. 2019. An open resource of structural variation for medical and  
544 population genetics. *bioRxiv* 578674. <https://www.biorxiv.org/content/10.1101/578674v1>  
545 (Accessed June 28, 2019).
- 546 Cooper GM, Coe BP, Girirajan S, Rosenfeld J a, Vu TH, Baker C, Williams C, Stalker H, Hamid R,  
547 Hannig V, et al. 2011. A copy number variation morbidity map of developmental delay. *Nat*  
548 *Genet* **43**: 838–46.  
549 [http://www.pubmedcentral.nih.gov/articlerender.fcgi?artid=3171215&tool=pmcentrez&rendertype](http://www.pubmedcentral.nih.gov/articlerender.fcgi?artid=3171215&tool=pmcentrez&rendertype=abstract)  
550 [pe=abstract](http://www.pubmedcentral.nih.gov/articlerender.fcgi?artid=3171215&tool=pmcentrez&rendertype=abstract) (Accessed July 23, 2014).
- 551 Crasta K, Ganem NJ, Dagher R, Lantermann AB, Ivanova E V, Pan Y, Nezi L, Protopopov A,  
552 Chowdhury D, Pellman D. 2012. DNA breaks and chromosome pulverization from errors in  
553 mitosis. *Nature* **482**: 53–8. <http://www.nature.com/doi/10.1038/nature10802> (Accessed  
554 June 24, 2015).
- 555 De S, Michor F. 2011. DNA replication timing and long-range DNA interactions predict mutational  
556 landscapes of cancer genomes. *Nat Biotechnol* **29**: 1103–1108.  
557 <http://www.ncbi.nlm.nih.gov/pubmed/22101487> (Accessed July 30, 2019).
- 558 Dixon JR, Xu J, Dileep V, Zhan Y, Song F, Le VT, Yardımcı GG, Chakraborty A, Bann D V., Wang  
559 Y, et al. 2018. Integrative detection and analysis of structural variation in cancer genomes. *Nat*  
560 *Genet* **50**: 1388–1398. <http://www.ncbi.nlm.nih.gov/pubmed/30202056> (Accessed July 17,

- 561 2019).
- 562 Dolgalev I, Sedlazeck F, Busby B. 2017. DangerTrack: A scoring system to detect difficult-to-assess  
563 regions. *F1000Research* **6**: 443. <http://www.ncbi.nlm.nih.gov/pubmed/28503299> (Accessed July  
564 16, 2019).
- 565 Drier Y, Lawrence MS, Carter SL, Stewart C, Gabriel SB, Lander ES, Meyerson M, Beroukheim R,  
566 Getz G. 2013. Somatic rearrangements across cancer reveal classes of samples with distinct  
567 patterns of DNA breakage and rearrangement-induced hypermutability. *Genome Res* **23**: 228–35.  
568 <http://www.ncbi.nlm.nih.gov/pubmed/23124520> (Accessed September 5, 2019).
- 569 Fortin J-P, Hansen KD. 2015. Reconstructing A/B compartments as revealed by Hi-C using long-  
570 range correlations in epigenetic data. *Genome Biol* **16**: 180.  
571 <http://www.ncbi.nlm.nih.gov/pubmed/26316348> (Accessed October 17, 2019).
- 572 Fukami M, Shima H, Suzuki E, Ogata T, Matsubara K, Kamimaki T. 2017. Catastrophic cellular  
573 events leading to complex chromosomal rearrangements in the germline. *Clin Genet* **91**: 653–  
574 660. <http://doi.wiley.com/10.1111/cge.12928> (Accessed October 2, 2019).
- 575 Fungtammasan A, Walsh E, Chiaromonte F, Eckert KA, Makova KD. 2012. A genome-wide analysis  
576 of common fragile sites: What features determine chromosomal instability in the human  
577 genome? *Genome Res* **22**: 993–1005. <http://www.ncbi.nlm.nih.gov/pubmed/22456607> (Accessed  
578 July 17, 2019).
- 579 Furey TS, Haussler D. 2003. Integration of the cytogenetic map with the draft human genome  
580 sequence. *Hum Mol Genet* **12**: 1037–1044. [https://academic.oup.com/hmg/article-  
581 lookup/doi/10.1093/hmg/ddg113](https://academic.oup.com/hmg/article-lookup/doi/10.1093/hmg/ddg113) (Accessed July 17, 2019).
- 582 Ganem NJ, Godinho SA, Pellman D. 2009. A mechanism linking extra centrosomes to chromosomal  
583 instability. *Nature* **460**: 278–282. <http://www.ncbi.nlm.nih.gov/pubmed/19506557> (Accessed  
584 July 22, 2019).
- 585 Guelen L, Pagie L, Brassat E, Meuleman W, Faza MB, Talhout W, Eussen BH, de Klein A, Wessels  
586 L, de Laat W, et al. 2008. Domain organization of human chromosomes revealed by mapping of  
587 nuclear lamina interactions. *Nature* **453**: 948–951. <http://www.nature.com/articles/nature06947>  
588 (Accessed July 17, 2019).
- 589 Hatch EM, Fischer AH, Deerinck TJ, Hetzer MW. 2013. Catastrophic Nuclear Envelope Collapse in  
590 Cancer Cell Micronuclei. *Cell* **154**: 47–60. <http://www.ncbi.nlm.nih.gov/pubmed/23827674>  
591 (Accessed September 4, 2019).
- 592 Holland AJ, Cleveland DW. 2012. Chromoanagenesis and cancer: mechanisms and consequences of  
593 localized, complex chromosomal rearrangements. *Nat Med* **18**: 1630–8.

- 594 <http://www.pubmedcentral.nih.gov/articlerender.fcgi?artid=3616639&tool=pmcentrez&rendertype=abstract> (Accessed January 7, 2016).
- 595
- 596 Hsu TC. 1975. A possible function of constitutive heterochromatin: the bodyguard hypothesis.
- 597 *Genetics* **79 Suppl**: 137–50. <http://www.ncbi.nlm.nih.gov/pubmed/1150080> (Accessed July 30,
- 598 2019).
- 599 Kent WJ. 2002. BLAT---The BLAST-Like Alignment Tool. *Genome Res* **12**: 656–664.
- 600 <http://www.ncbi.nlm.nih.gov/pubmed/11932250> (Accessed July 12, 2018).
- 601 Kloosterman WP, Guryev V, van Roosmalen M, Duran KJ, de Bruijn E, Bakker SCM, Letteboer T,
- 602 van Nesselrooij B, Hochstenbach R, Poot M, et al. 2011. Chromothripsis as a mechanism driving
- 603 complex de novo structural rearrangements in the germline. *Hum Mol Genet* **20**: 1916–24.
- 604 <http://www.ncbi.nlm.nih.gov/pubmed/21349919> (Accessed January 7, 2016).
- 605 Korbelt JO, Campbell PJ. 2013. Criteria for inference of chromothripsis in cancer genomes. *Cell* **152**:
- 606 1226–36. <http://www.ncbi.nlm.nih.gov/pubmed/23498933> (Accessed December 30, 2015).
- 607 Koren A, Polak P, Nemesh J, Michaelson JJ, Sebat J, Sunyaev SR, McCarroll SA. 2012. Differential
- 608 Relationship of DNA Replication Timing to Different Forms of Human Mutation and Variation.
- 609 *Am J Hum Genet* **91**: 1033–1040. <http://www.ncbi.nlm.nih.gov/pubmed/23176822> (Accessed
- 610 July 30, 2019).
- 611 Kürten S, Obe G. 1975. Premature chromosome condensation in the bone marrow of Chinese hamsters
- 612 after application of bleomycin in vivo. *Mutat Res Mol Mech Mutagen* **27**: 285–294.
- 613 <https://www.sciencedirect.com/science/article/pii/0027510775900895> (Accessed July 26, 2019).
- 614 Lejeune J, Gautier M, Turpin R. 1959. Etude des chromosomes somatiques de 9 enfants mongoliens.
- 615 *C R Hebd Seances Acad Sci* **248**: 1721–2. <http://www.ncbi.nlm.nih.gov/pubmed/13639368>
- 616 (Accessed May 21, 2015).
- 617 Lek M, Karczewski KJ, Minikel E V., Samocha KE, Banks E, Fennell T, O'Donnell-Luria AH, Ware
- 618 JS, Hill AJ, Cummings BB, et al. 2016. Analysis of protein-coding genetic variation in 60,706
- 619 humans. *Nature* **536**: 285–291. <http://www.ncbi.nlm.nih.gov/pubmed/27535533> (Accessed July
- 620 24, 2018).
- 621 Lemaître C, Grabarz A, Tsouroula K, Andronov L, Furst A, Pankotai T, Heyer V, Rogier M, Attwood
- 622 KM, Kessler P, et al. 2014. Nuclear position dictates DNA repair pathway choice. *Genes Dev* **28**:
- 623 2450–2463. <http://www.ncbi.nlm.nih.gov/pubmed/25366693> (Accessed July 18, 2019).
- 624 Liu L, De S, Michor F. 2013. DNA replication timing and higher-order nuclear organization determine
- 625 single-nucleotide substitution patterns in cancer genomes. *Nat Commun* **4**: 1502.
- 626 <http://www.ncbi.nlm.nih.gov/pubmed/23422670> (Accessed July 30, 2019).

- 627 Liu P, Erez A, Nagamani SCS, Dhar SU, Kołodziejaska KE, Dharmadhikari A V, Cooper ML,  
628 Wiszniewska J, Zhang F, Withers MA, et al. 2011. Chromosome catastrophes involve replication  
629 mechanisms generating complex genomic rearrangements. *Cell* **146**: 889–903.  
630 [http://www.pubmedcentral.nih.gov/articlerender.fcgi?artid=3242451&tool=pmcentrez&renderty](http://www.pubmedcentral.nih.gov/articlerender.fcgi?artid=3242451&tool=pmcentrez&rendertype=abstract)  
631 [pe=abstract](http://www.pubmedcentral.nih.gov/articlerender.fcgi?artid=3242451&tool=pmcentrez&rendertype=abstract) (Accessed January 7, 2016).
- 632 Maciejowski J, Li Y, Bosco N, Campbell PJ, de Lange T. 2015. Chromothripsis and Kataegis Induced  
633 by Telomere Crisis. *Cell* **163**: 1641–1654. <http://www.ncbi.nlm.nih.gov/pubmed/26687355>  
634 (Accessed December 18, 2015).
- 635 Mardin BR, Drainas AP, Waszak SM, Weischenfeldt J, Isokane M, Stütz AM, Raeder B,  
636 Efthymiopoulos T, Buccitelli C, Segura-Wang M, et al. 2015. A cell-based model system links  
637 chromothripsis with hyperploidy. *Mol Syst Biol* **11**: 828.  
638 [http://www.pubmedcentral.nih.gov/articlerender.fcgi?artid=4592670&tool=pmcentrez&renderty](http://www.pubmedcentral.nih.gov/articlerender.fcgi?artid=4592670&tool=pmcentrez&rendertype=abstract)  
639 [pe=abstract](http://www.pubmedcentral.nih.gov/articlerender.fcgi?artid=4592670&tool=pmcentrez&rendertype=abstract) (Accessed October 6, 2015).
- 640 Masset H, Hestand MS, Van Esch H, Kleinfinger P, Plaisancié J, Afenjar A, Mollignier R, Schluth-  
641 Bolard C, Sanlaville D, Vermeesch JR. 2016. A Distinct Class of Chromoanagenesis Events  
642 Characterized by Focal Copy Number Gains. *Hum Mutat*.
- 643 Massip F, Laurent M, Brossas C, Fernández-Justel JM, Gómez M, Prioleau M-N, Duret L, Picard F.  
644 2019. Evolution of replication origins in vertebrate genomes: rapid turnover despite selective  
645 constraints. *Nucleic Acids Res* **47**: 5114–5125.  
646 <https://academic.oup.com/nar/article/47/10/5114/5420529> (Accessed September 4, 2019).
- 647 Obe G, Beek B. 1975. The human leucocyte test system. VII. Further investigations concerning  
648 micronucleus-derived premature chromosome condensation. *Humangenetik* **30**: 143–54.  
649 <http://www.ncbi.nlm.nih.gov/pubmed/1193601> (Accessed July 26, 2019).
- 650 Pampalona J, Roscioli E, Silkworth WT, Bowden B, Genescà A, Tusell L, Cimini D. 2016.  
651 Chromosome Bridges Maintain Kinetochores-Microtubule Attachment throughout Mitosis and  
652 Rarely Break during Anaphase. ed. Y. Wang. *PLoS One* **11**: e0147420.  
653 <https://dx.plos.org/10.1371/journal.pone.0147420> (Accessed July 15, 2019).
- 654 Pellestor F. 2014. Chromothripsis: how does such a catastrophic event impact human reproduction?  
655 *Hum Reprod* **29**: 388–393. <http://www.ncbi.nlm.nih.gov/pubmed/24452388> (Accessed October  
656 2, 2019).
- 657 Rao SSP, Huntley MH, Durand NC, Stamenova EK, Bochkov ID, Robinson JT, Sanborn AL, Machol  
658 I, Omer AD, Lander ES, et al. 2014. A 3D Map of the Human Genome at Kilobase Resolution  
659 Reveals Principles of Chromatin Looping. *Cell* **159**: 1665–1680.

- 660 <http://www.ncbi.nlm.nih.gov/pubmed/25497547> (Accessed July 17, 2019).
- 661 Redin C, Brand H, Collins RL, Kammin T, Mitchell E, Hodge JC, Hanscom C, Pillalamarri V, Seabra  
662 CM, Abbott M-A, et al. 2017. The genomic landscape of balanced cytogenetic abnormalities  
663 associated with human congenital anomalies. *Nat Genet* **49**: 36–45.  
664 <http://www.ncbi.nlm.nih.gov/pubmed/27841880> (Accessed August 6, 2018).
- 665 Ripley B, Venables W. 2016. R Package ‘nnet.’ <https://cran.r-project.org/web/packages/nnet/>.
- 666 Robinson JT, Thorvaldsdóttir H, Winckler W, Guttman M, Lander ES, Getz G, Mesirov JP. 2011.  
667 Integrative genomics viewer. *Nat Biotechnol* **29**: 24–6. <http://dx.doi.org/10.1038/nbt.1754>  
668 (Accessed November 19, 2014).
- 669 Ryba T, Hiratani I, Lu J, Itoh M, Kulik M, Zhang J, Schulz TC, Robins AJ, Dalton S, Gilbert DM.  
670 2010. Evolutionarily conserved replication timing profiles predict long-range chromatin  
671 interactions and distinguish closely related cell types. *Genome Res* **20**: 761–770.  
672 <http://www.ncbi.nlm.nih.gov/pubmed/20430782> (Accessed July 31, 2019).
- 673 Schluth-Bolard C, Diguët F, Chatron N, Rollat-Farnier P-A, Bardel C, Afenjar A, Amblard F, Amiel J,  
674 Blesson S, Callier P, et al. 2019. Whole genome paired-end sequencing elucidates functional and  
675 phenotypic consequences of balanced chromosomal rearrangement in patients with  
676 developmental disorders. *J Med Genet* jmedgenet-2018-105778.  
677 <http://www.ncbi.nlm.nih.gov/pubmed/30923172> (Accessed May 10, 2019).
- 678 Slamova Z, Nazaryan-Petersen L, Mehrjouy MM, Drabova J, Hancarova M, Marikova T, Novotna D,  
679 Vlckova M, Vlckova Z, Bak M, et al. 2018. Very short DNA segments can be detected and  
680 handled by the repair machinery during germline chromothriptic chromosome reassembly. *Hum*  
681 *Mutat* **39**: 709–716. <http://www.ncbi.nlm.nih.gov/pubmed/29405539> (Accessed November 1,  
682 2019).
- 683 Soutoglou E, Dorn JF, Sengupta K, Jasin M, Nussenzweig A, Ried T, Danuser G, Misteli T. 2007.  
684 Positional stability of single double-strand breaks in mammalian cells. *Nat Cell Biol* **9**: 675–682.  
685 <http://www.ncbi.nlm.nih.gov/pubmed/17486118> (Accessed October 10, 2019).
- 686 Stankiewicz P, Lupski JR. 2002. Genome architecture, rearrangements and genomic disorders. *Trends*  
687 *Genet* **18**: 74–82. <http://www.ncbi.nlm.nih.gov/pubmed/11818139> (Accessed November 1,  
688 2019).
- 689 Stephens PJ, Greenman CD, Fu B, Yang F, Bignell GR, Mudie LJ, Pleasance ED, Lau KW, Beare D,  
690 Stebbings LA, et al. 2011. Massive Genomic Rearrangement Acquired in a Single Catastrophic  
691 Event during Cancer Development. *Cell* **144**: 27–40.  
692 <http://www.ncbi.nlm.nih.gov/pubmed/21215367> (Accessed December 13, 2018).



- 693 Storchová Z, Kloosterman WP. 2016. The genomic characteristics and cellular origin of  
694 chromothripsis. *Curr Opin Cell Biol* **40**: 106–113.  
695 <http://www.ncbi.nlm.nih.gov/pubmed/27023493> (Accessed May 22, 2016).
- 696 Sudmant PH, Rausch T, Gardner EJ, Handsaker RE, Abyzov A, Huddleston J, Zhang Y, Ye K, Jun G,  
697 Hsi-Yang Fritz M, et al. 2015. An integrated map of structural variation in 2,504 human  
698 genomes. *Nature* **526**: 75–81. <http://www.nature.com/articles/nature15394> (Accessed July 4,  
699 2019).
- 700 Terzoudi GI, Karakosta M, Pantelias A, Hatzi VI, Karachristou I, Pantelias G. 2015. Stress induced by  
701 premature chromatin condensation triggers chromosome shattering and chromothripsis at DNA  
702 sites still replicating in micronuclei or multinucleate cells when primary nuclei enter mitosis.  
703 *Mutat Res Genet Toxicol Environ Mutagen* **793**: 185–98.  
704 <https://linkinghub.elsevier.com/retrieve/pii/S1383571815002041> (Accessed December 18, 2018).
- 705 Titen SWA, Golic KG. 2008. Telomere loss provokes multiple pathways to apoptosis and produces  
706 genomic instability in *Drosophila melanogaster*. *Genetics* **180**: 1821–32.  
707 <http://www.genetics.org/lookup/doi/10.1534/genetics.108.093625> (Accessed July 15, 2019).
- 708 Tubio JMC, Estivill X. 2011. When catastrophe strikes a cell. *Nature* **470**: 476–477.  
709 <http://www.ncbi.nlm.nih.gov/pubmed/21350479> (Accessed September 11, 2019).
- 710 Waters LS, Walker GC. 2006. The critical mutagenic translesion DNA polymerase Rev1 is highly  
711 expressed during G(2)/M phase rather than S phase. *Proc Natl Acad Sci U S A* **103**: 8971–6.  
712 <http://www.ncbi.nlm.nih.gov/pubmed/16751278> (Accessed July 30, 2019).
- 713 Yang J, Deng G, Cai H. 2015. ChromothripsisDB: a curated database of chromothripsis.  
714 *Bioinformatics*. <http://www.ncbi.nlm.nih.gov/pubmed/26722116> (Accessed January 2, 2016).
- 715 Zhu M, Need AC, Han Y, Ge D, Maia JM, Zhu Q, Heinzen EL, Cirulli ET, Pelak K, He M, et al.  
716 2012. Using ERDS to infer copy-number variants in high-coverage genomes. *Am J Hum Genet*  
717 **91**: 408–21.  
718 [http://www.pubmedcentral.nih.gov/articlerender.fcgi?artid=3511991&tool=pmcentrez&renderty  
719 pe=abstract](http://www.pubmedcentral.nih.gov/articlerender.fcgi?artid=3511991&tool=pmcentrez&rendertype=abstract) (Accessed January 8, 2016).

720

721 **Supplementary Table S1:** List of annotated breakpoints detected in our cohort of complex  
722 chromosomal rearrangements (CCRs), in external cases of CCRs (cancer and constitutional), simple  
723 rearrangements and simulations. For replication timing, CE, CL and S stand for constitutive early,  
724 constitutive late and switching respectively. Only the two first ones were used for statistical analyses.

725 **Supplementary File S1:** Individual phenotypic and cytogenetic results before genome sequencing. List  
726 of junctions resolved in both forward and reverse orientations with the same repairing mechanism  
727 obtained from genome sequencing data with inferred repairing mechanism.



| Variable        | Group                 | Free simulation     |               |                     | Constrained simulation |               |                    |
|-----------------|-----------------------|---------------------|---------------|---------------------|------------------------|---------------|--------------------|
|                 |                       | Relative Risk Ratio | CI 95%        | p value             | Relative Risk Ratio    | CI 95%        | p value            |
| Gene disruption | Cancer CCRs           | 1,057               | [1,021-1,094] | 0,002               | 1,07                   | [1,034-1,108] | 1x10 <sup>-4</sup> |
|                 | Constitutional CCRs   | 0,807               | [0,712-0,915] | 0,001               | 0,818                  | [0,722-0,927] | 0,002              |
|                 | Simple Rearrangements | 1                   | [0,833-1,2]   | 1                   | 1,013                  | [0,844-1,216] | 0,891              |
| pLI             | Cancer CCRs           | 0,929               | [0,873-0,988] | 0,02                | 0,92                   | [0,864-0,979] | 0,008              |
|                 | Constitutional CCRs   | 0,751               | [0,589-0,958] | 0,021               | 0,746                  | [0,585-0,952] | 0,019              |
|                 | Simple Rearrangements | 2,276               | [1,645-3,151] | 7x10 <sup>-7</sup>  | 2,267                  | [1,637-3,137] | 8x10 <sup>-7</sup> |
| TAD disruption  | Cancer CCRs           | 1,12                | [1,081-1,16]  | 3x10 <sup>-10</sup> | 1,113                  | [1,075-1,153] | 2x10 <sup>-9</sup> |
|                 | Constitutional CCRs   | 0,872               | [0,771-0,985] | 0,028               | 0,867                  | [0,767-0,98]  | 0,022              |
|                 | Simple Rearrangements | 1,111               | [0,924-1,336] | 0,261               | 1,105                  | [0,919-1,328] | 0,29               |

728

729 **Supplementary Table S2:** Univariate analysis of breakpoint distribution across genomic features related to gene dysregulation. While constitutional CCRs  
730 affect a reduced proportion of genes and TADs compared to simulations, simple rearrangements are more likely to affect haplosensitive genes.

| Variable                       | Group                 | Free simulation     |               |                     | Constrained simulation |               |                     |
|--------------------------------|-----------------------|---------------------|---------------|---------------------|------------------------|---------------|---------------------|
|                                |                       | Relative Risk Ratio | CI 95%        | p,value             | Relative Risk Ratio    | CI 95%        | p,value             |
| Gene disruption                | Cancer CCRs           | 0,998               | [0,931-1,069] | 0,955               | 0,998                  | [0,931-1,069] | 0,949               |
|                                | Constitutional CCRs   | 0,606               | [0,455-0,808] | 0,001               | 0,605                  | [0,454-0,806] | 0,001               |
|                                | Simple Rearrangements | 1,055               | [0,704-1,581] | 0,795               | 1,049                  | [0,7-1,572]   | 0,818               |
| TAD disruption                 | Cancer CCRs           | 0,950               | [0,878-1,027] | 0,195               | 0,933                  | [0,863-1,009] | 0,082               |
|                                | Constitutional CCRs   | 0,882               | [0,652-1,193] | 0,417               | 0,860                  | [0,636-1,162] | 0,326               |
|                                | Simple Rearrangements | 1,421               | [0,877-2,303] | 0,154               | 1,386                  | [0,856-2,242] | 0,184               |
| Repeated element               | Cancer CCRs           | 1,135               | [1,061-1,214] | $2 \times 10^{-4}$  | 1,126                  | [1,052-1,204] | 0,001               |
|                                | Constitutional CCRs   | 1,014               | [0,775-1,327] | 0,919               | 1,004                  | [0,767-1,314] | 0,977               |
|                                | Simple Rearrangements | 1,285               | [0,865-1,908] | 0,214               | 1,280                  | [0,862-1,901] | 0,222               |
| G band positive staining       | Cancer CCRs           | 1,103               | [1,026-1,186] | 0,008               | 1,064                  | [0,99-1,143]  | 0,094               |
|                                | Constitutional CCRs   | 0,860               | [0,639-1,156] | 0,317               | 0,826                  | [0,614-1,111] | 0,207               |
|                                | Simple Rearrangements | 0,769               | [0,5-1,183]   | 0,232               | 0,743                  | [0,483-1,142] | 0,176               |
| Open chromatin compartment     | Cancer CCRs           | 1,009               | [0,931-1,094] | 0,824               | 1,074                  | [0,992-1,164] | 0,078               |
|                                | Constitutional CCRs   | 1,499               | [1,087-2,066] | 0,014               | 1,553                  | [1,129-2,137] | 0,007               |
|                                | Simple Rearrangements | 0,618               | [0,394-0,969] | 0,036               | 0,665                  | [0,426-1,037] | 0,072               |
| Distance to replication origin | Cancer CCRs           | 0,982               | [0,969-0,995] | 0,008               | 0,988                  | [0,975-1,001] | 0,075               |
|                                | Constitutional CCRs   | 1,036               | [0,971-1,105] | 0,280               | 1,042                  | [0,976-1,111] | 0,218               |
|                                | Simple Rearrangements | 0,977               | [0,904-1,055] | 0,547               | 0,982                  | [0,909-1,061] | 0,647               |
| LAD disruption                 | Cancer CCRs           | 0,960               | [0,88-1,046]  | 0,352               | 0,987                  | [0,905-1,077] | 0,773               |
|                                | Constitutional CCRs   | 0,932               | [0,678-1,281] | 0,666               | 0,935                  | [0,679-1,289] | 0,683               |
|                                | Simple Rearrangements | 0,454               | [0,26-0,793]  | 0,006               | 0,466                  | [0,266-0,816] | 0,008               |
| Late replication timing        | Cancer CCRs           | 1,305               | [1,187-1,434] | $3 \times 10^{-8}$  | 1,431                  | [1,303-1,572] | $7 \times 10^{-14}$ |
|                                | Constitutional CCRs   | 3,419               | [2,376-4,92]  | $3 \times 10^{-11}$ | 3,713                  | [2,583-5,338] | $1 \times 10^{-12}$ |
|                                | Simple Rearrangements | 1,930               | [1,127-3,306] | 0,017               | 2,149                  | [1,259-3,668] | 0,005               |

731 **Supplementary Table S3:** Multivariate analysis of breakpoint distribution across different types of chromosomal rearrangements. The logistic regression model  
732 presented is the addition of each covariable that has the lowest Akaike information criterion tested (AIC = 36663,63 and 36558.53 for constrained and free  
733 simulation as reference group respectively. Late replication-timing appears as the only significant variable for both cancer and constitutional CCRs. Simple  
734 rearrangements diverge from simulation with a depletion in LADs.

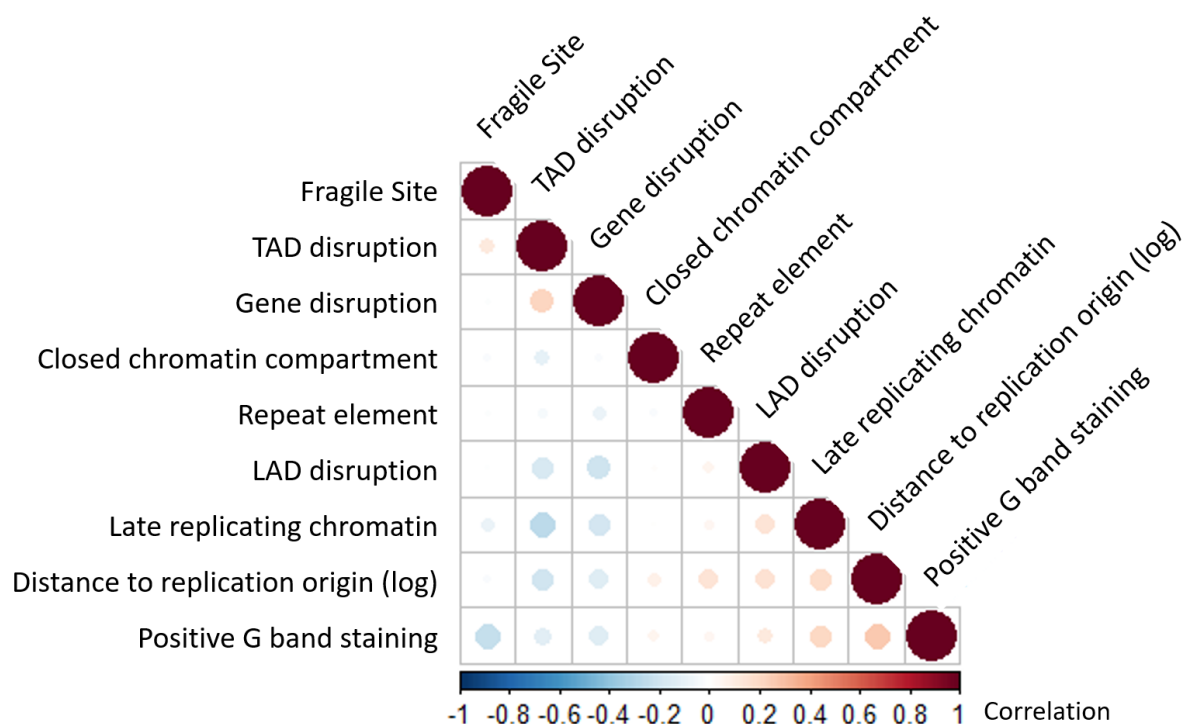

735

736 **Supplementary Figure S1:** Correlation matrix (Pearson) of the analyzed variables based on our dataset  
737 of constitutional CCRs.

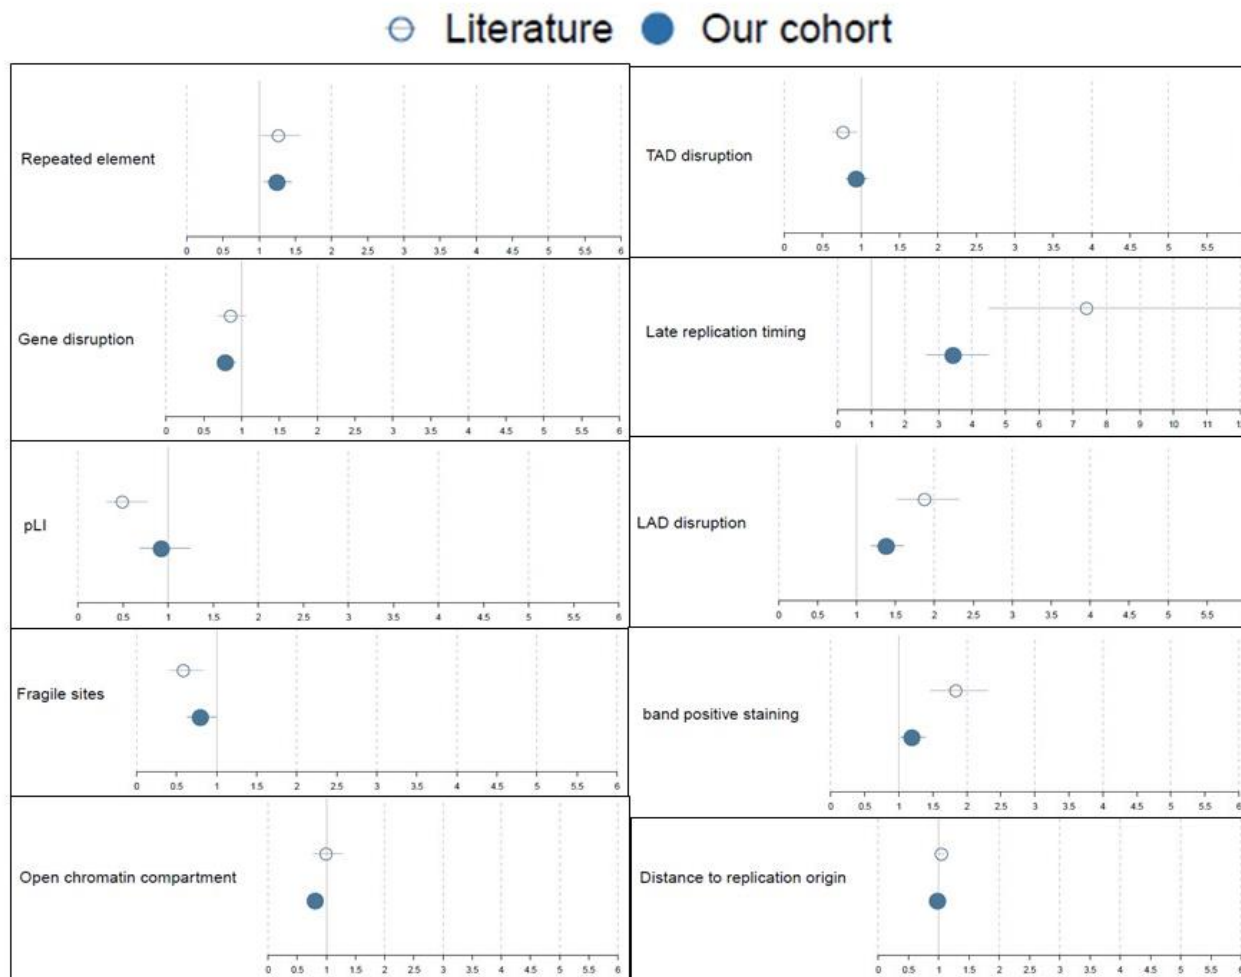

738

739 **Supplementary Figure S2:** Univariate analysis of breakpoint distribution for our cohort (n=682 breakpoints) and constitutional cases from the literature (n=350  
 740 breakpoints) using our “free simulation as a reference group. Relative risk ratios and 95 % confidence intervals systematically overlap and/or are shifted in the  
 741 same direction so that the two groups can be merged for further analyses.
